# Supplementary material for: Vibrational-Excitation-Induced and Spontaneous Conformational Changes in Solid Para-H2—Diminished Matrix Effects
Source: MDPI journal article supplement (doi:10.3390/photochem2030039), 2022-07-26
Supplement: s1 [file s1]

**Supporting Information for**

**Vibrational excitation induced and spontaneous conformational changes in  
solid *para*-H<sub>2</sub> – diminished matrix effects**

Sándor Góbi <sup>1,\*</sup>, Gopi Ragupathy <sup>1</sup>, Gábor Bázsó <sup>2</sup>, and György Tarczay<sup>1,3,4,\*</sup>

<sup>1</sup> MTA-ELTE Lendület Laboratory Astrochemistry Research Group, Institute of Chemistry,  
ELTE Eötvös Loránd University, H-1518 Budapest, Hungary

<sup>2</sup> Wigner Research Centre for Physics, P.O. Box 49, H-1525 Budapest, Hungary

<sup>3</sup> Laboratory of Molecular Spectroscopy, Institute of Chemistry, ELTE Eötvös Loránd  
University, H-1518 Budapest, Hungary

<sup>4</sup> Centre for Astrophysics and Space Science, ELTE Eötvös Loránd University, H-1518  
Budapest, Hungary

**Table S1.** Geometry of *trans*-FA in Cartesian coordinates (in Å) as optimized at the B3LYP/cc-pVTZ level of theory.

| Atomic label | Coordinates (angstroms) |           |          |
|--------------|-------------------------|-----------|----------|
|              | X                       | Y         | Z        |
| H            | −0.653873               | −1.341004 | 0.000000 |
| O            | −1.028176               | −0.445958 | 0.000000 |
| O            | 1.158081                | 0.117622  | 0.000000 |
| C            | 0.000000                | 0.420204  | 0.000000 |
| H            | −0.385365               | 1.446471  | 0.000000 |

**Table S2.** Geometry of *cis*-FA in Cartesian coordinates (in Å) as optimized at the B3LYP/cc-pVTZ level of theory.

| Atomic label | Coordinates (angstroms) |           |           |
|--------------|-------------------------|-----------|-----------|
|              | X                       | Y         | Z         |
| H            | −1.774387               | 0.365731  | 0.001038  |
| O            | −1.056652               | −0.279206 | −0.000128 |
| O            | 1.173407                | −0.219111 | 0.000089  |
| C            | 0.133552                | 0.360223  | −0.000082 |
| H            | 0.039031                | 1.459471  | −0.000228 |

**Table S3.** Geometry of *trans*-AA in Cartesian coordinates (in Å) as optimized at the B3LYP/cc-pVTZ level of theory.

| Atomic label | Coordinates (angstroms) |           |           |
|--------------|-------------------------|-----------|-----------|
|              | X                       | Y         | Z         |
| H            | 1.867442                | 0.355366  | 0.000000  |
| O            | 1.243523                | -0.385384 | 0.000000  |
| O            | -0.186783               | 1.344061  | 0.000000  |
| C            | 0.000000                | 0.155508  | 0.000000  |
| C            | -1.062840               | -0.905818 | 0.000000  |
| H            | -0.951127               | -1.542045 | 0.877971  |
| H            | -2.042061               | -0.438832 | 0.000000  |
| H            | -0.951127               | -1.542045 | -0.877971 |

**Table S4.** Geometry of *cis*-AA in Cartesian coordinates (in Å) as optimized at the B3LYP/cc-pVTZ level of theory.

| Atomic label | Coordinates (angstroms) |           |           |
|--------------|-------------------------|-----------|-----------|
|              | X                       | Y         | Z         |
| H            | 1.413022                | -1.117201 | 0.000000  |
| O            | 1.317461                | -0.158058 | 0.000000  |
| O            | -0.310033               | 1.347835  | 0.000000  |
| C            | 0.000000                | 0.192609  | 0.000000  |
| C            | -0.973295               | -0.965428 | 0.000000  |
| H            | -0.821869               | -1.590139 | 0.882544  |
| H            | -1.988940               | -0.583823 | 0.000000  |
| H            | -0.821869               | -1.590139 | -0.882544 |

**Table S5.** Geometry of glycine conformer **I** in Cartesian coordinates (in Angstrom units) as optimized at the B3LYP/cc-pVTZ level of theory.

| Atomic label | Coordinates (angstroms) |           |           |
|--------------|-------------------------|-----------|-----------|
|              | X                       | Y         | Z         |
| N            | 0.411615                | -1.927211 | 0.000000  |
| C            | -0.564547               | -0.858984 | 0.000000  |
| C            | 0.000000                | 0.553087  | 0.000000  |
| O            | 1.168657                | 0.840010  | 0.000000  |
| H            | 1.017779                | -1.845176 | 0.807364  |
| H            | -1.219969               | -0.950538 | -0.869135 |
| H            | -1.219969               | -0.950538 | 0.869135  |
| O            | -0.985122               | 1.480861  | 0.000000  |
| H            | 1.017779                | -1.845176 | -0.807364 |
| H            | -0.557923               | 2.350320  | 0.000000  |

**Table S6.** Geometry of glycine conformer **III** in Cartesian coordinates (in Angstrom units) as optimized at the B3LYP/cc-pVTZ level of theory.

| Atomic label | Coordinates (angstroms) |           |           |
|--------------|-------------------------|-----------|-----------|
|              | X                       | Y         | Z         |
| N            | -0.633960               | -0.098376 | 0.000111  |
| C            | -1.669036               | -0.711691 | -0.000073 |
| C            | -0.587135               | 1.255555  | 0.000000  |
| O            | -1.506535               | 1.561148  | -0.000096 |
| H            | 0.743893                | -0.749902 | 0.000086  |
| H            | 0.762436                | -1.411804 | -0.867953 |
| H            | 0.762544                | -1.411596 | 0.868284  |
| O            | 1.927758                | 0.087724  | -0.000078 |
| H            | 1.938463                | 0.693379  | -0.810731 |
| H            | 1.938558                | 0.693555  | 0.810441  |

**Table S7.** Harmonic and anharmonic vibrational frequencies and their intensities of *trans*-FA as computed at the B3LYP/cc-pVTZ level of theory.

| Mode (quanta) | $\nu_{\text{harm}}$ ( $\text{cm}^{-1}$ ) | $\nu_{\text{anharm}}$ ( $\text{cm}^{-1}$ ) | $I_{\text{harm}}$ ( $\text{km mol}^{-1}$ ) | $I_{\text{anharm}}$ ( $\text{km mol}^{-1}$ ) |
|---------------|------------------------------------------|--------------------------------------------|--------------------------------------------|----------------------------------------------|
| 1(1)          | 1055.0                                   | 1034.8                                     | 1.5                                        | 1.1                                          |
| 2(1)          | 685.9                                    | 618.1                                      | 138.9                                      | 135.7                                        |
| 3(1)          | 3723.8                                   | 3518.8                                     | 55.0                                       | 45.0                                         |
| 4(1)          | 3046.9                                   | 2886.8                                     | 47.7                                       | 46.8                                         |
| 5(1)          | 1826.2                                   | 1792.4                                     | 339.9                                      | 322.5                                        |
| 6(1)          | 1405.7                                   | 1374.9                                     | 2.6                                        | 2.4                                          |
| 7(1)          | 1306.9                                   | 1279.7                                     | 8.6                                        | 12.2                                         |
| 8(1)          | 1125.7                                   | 1093.1                                     | 249.9                                      | 246.3                                        |
| 9(1)          | 629.9                                    | 622.7                                      | 43.9                                       | 41.7                                         |
| 1(2)          | 2110.0                                   | 2064.0                                     |                                            | 0.1                                          |
| 2(2)          | 1371.9                                   | 1169.5                                     |                                            | 3.2                                          |
| 3(2)          | 7447.5                                   | 6857.0                                     |                                            | 3.7                                          |
| 4(2)          | 6093.9                                   | 5643.6                                     |                                            | 0.5                                          |
| 5(2)          | 3652.4                                   | 3565.6                                     |                                            | 3.7                                          |
| 6(2)          | 2811.3                                   | 2726.9                                     |                                            | 1.0                                          |
| 7(2)          | 2613.8                                   | 2513.4                                     |                                            | 1.1                                          |
| 8(2)          | 2251.3                                   | 2174.7                                     |                                            | 4.7                                          |
| 9(2)          | 1259.9                                   | 1246.6                                     |                                            | 0.2                                          |
| 2(1) 1(1)     | 1741.0                                   | 1651.4                                     |                                            | 0.3                                          |
| 3(1) 1(1)     | 4778.8                                   | 4552.1                                     |                                            | 0.0                                          |
| 3(1) 2(1)     | 4409.7                                   | 4123.7                                     |                                            | 0.8                                          |
| 4(1) 1(1)     | 4101.9                                   | 3903.3                                     |                                            | 0.0                                          |
| 4(1) 2(1)     | 3732.9                                   | 3502.0                                     |                                            | 0.0                                          |
| 4(1) 3(1)     | 6770.7                                   | 6401.9                                     |                                            | 0.1                                          |
| 5(1) 1(1)     | 2881.2                                   | 2821.6                                     |                                            | 0.2                                          |
| 5(1) 2(1)     | 2512.2                                   | 2409.5                                     |                                            | 0.0                                          |
| 5(1) 3(1)     | 5550.0                                   | 5310.4                                     |                                            | 0.5                                          |
| 5(1) 4(1)     | 4873.1                                   | 4668.8                                     |                                            | 1.2                                          |
| 6(1) 1(1)     | 2460.7                                   | 2408.6                                     |                                            | 0.0                                          |
| 6(1) 2(1)     | 2091.6                                   | 1985.9                                     |                                            | 0.0                                          |
| 6(1) 3(1)     | 5129.4                                   | 4885.5                                     |                                            | 0.4                                          |
| 6(1) 4(1)     | 4452.6                                   | 4238.4                                     |                                            | 0.0                                          |
| 6(1) 5(1)     | 3231.9                                   | 3162.6                                     |                                            | 1.0                                          |
| 7(1) 1(1)     | 2361.9                                   | 2296.8                                     |                                            | 0.0                                          |
| 7(1) 2(1)     | 1992.9                                   | 1867.8                                     |                                            | 0.0                                          |
| 7(1) 3(1)     | 5030.7                                   | 4761.4                                     |                                            | 1.1                                          |
| 7(1) 4(1)     | 4353.8                                   | 4146.2                                     |                                            | 0.4                                          |
| 7(1) 5(1)     | 3133.1                                   | 3055.7                                     |                                            | 3.6                                          |
| 7(1) 6(1)     | 2712.6                                   | 2627.5                                     |                                            | 0.1                                          |
| 8(1) 1(1)     | 2180.7                                   | 2124.3                                     |                                            | 0.0                                          |
| 8(1) 2(1)     | 1811.6                                   | 1703.2                                     |                                            | 0.1                                          |
| 8(1) 3(1)     | 4849.4                                   | 4610.9                                     |                                            | 0.1                                          |
| 8(1) 4(1)     | 4172.6                                   | 3977.6                                     |                                            | 0.4                                          |
| 8(1) 5(1)     | 2951.9                                   | 2881.1                                     |                                            | 1.7                                          |
| 8(1) 6(1)     | 2531.3                                   | 2458.1                                     |                                            | 0.2                                          |
| 8(1) 7(1)     | 2432.6                                   | 2342.6                                     |                                            | 2.6                                          |
| 9(1) 1(1)     | 1684.9                                   | 1657.2                                     |                                            | 0.0                                          |
| 9(1) 2(1)     | 1315.9                                   | 1240.5                                     |                                            | 0.0                                          |

|      |      |        |        |     |
|------|------|--------|--------|-----|
| 9(1) | 3(1) | 4353.7 | 4137.2 | 0.2 |
| 9(1) | 4(1) | 3676.9 | 3509.9 | 0.2 |
| 9(1) | 5(1) | 2456.1 | 2408.7 | 0.0 |
| 9(1) | 6(1) | 2035.6 | 1993.6 | 0.1 |
| 9(1) | 7(1) | 1936.8 | 1883.5 | 2.3 |
| 9(1) | 8(1) | 1755.6 | 1712.8 | 1.0 |

**Table S8.** Harmonic and anharmonic vibrational frequencies and their intensities of *cis*-FA as computed at the B3LYP/cc-pVTZ level of theory.

| Mode (quanta) | $\nu_{\text{harm}}$ ( $\text{cm}^{-1}$ ) | $\nu_{\text{anharm}}$ ( $\text{cm}^{-1}$ ) | $I_{\text{harm}}$ ( $\text{km mol}^{-1}$ ) | $I_{\text{anharm}}$ ( $\text{km mol}^{-1}$ ) |
|---------------|------------------------------------------|--------------------------------------------|--------------------------------------------|----------------------------------------------|
| 1(1)          | 3789.5                                   | 3587.8                                     | 54.1                                       | 43.9                                         |
| 2(1)          | 2953.9                                   | 2714.1                                     | 88.5                                       | 91.3                                         |
| 3(1)          | 1871.4                                   | 1836.5                                     | 280.4                                      | 264.2                                        |
| 4(1)          | 1420.5                                   | 1390.0                                     | 0.4                                        | 1.0                                          |
| 5(1)          | 1275.9                                   | 1225.9                                     | 308.9                                      | 305.7                                        |
| 6(1)          | 1111.5                                   | 1082.3                                     | 50.0                                       | 44.4                                         |
| 7(1)          | 1036.9                                   | 1018.4                                     | 0.1                                        | 0.0                                          |
| 8(1)          | 662.1                                    | 653.3                                      | 9.3                                        | 8.8                                          |
| 9(1)          | 534.4                                    | 443.0                                      | 84.1                                       | 80.6                                         |
| 1(2)          | 7579.1                                   | 6998.0                                     |                                            | 4.7                                          |
| 2(2)          | 5907.8                                   | 5417.8                                     |                                            | 0.4                                          |
| 3(2)          | 3742.9                                   | 3653.6                                     |                                            | 5.1                                          |
| 4(2)          | 2841.0                                   | 2847.4                                     |                                            | 1.5                                          |
| 5(2)          | 2551.8                                   | 2428.2                                     |                                            | 1.1                                          |
| 6(2)          | 2223.0                                   | 2150.7                                     |                                            | 3.3                                          |
| 7(2)          | 2073.7                                   | 2031.5                                     |                                            | 0.2                                          |
| 8(2)          | 1324.3                                   | 1306.8                                     |                                            | 0.2                                          |
| 9(2)          | 1068.7                                   | 818.2                                      |                                            | 4.7                                          |
| 2(1) 1(1)     | 6743.4                                   | 6367.5                                     |                                            | 0.1                                          |
| 3(1) 1(1)     | 5661.0                                   | 5421.1                                     |                                            | 0.0                                          |
| 3(1) 2(1)     | 4825.3                                   | 4613.5                                     |                                            | 1.4                                          |
| 4(1) 1(1)     | 5210.1                                   | 4976.0                                     |                                            | 0.0                                          |
| 4(1) 2(1)     | 4374.4                                   | 4112.3                                     |                                            | 0.1                                          |
| 4(1) 3(1)     | 3291.9                                   | 3223.5                                     |                                            | 0.8                                          |
| 5(1) 1(1)     | 5065.5                                   | 4802.2                                     |                                            | 1.2                                          |
| 5(1) 2(1)     | 4229.8                                   | 4005.0                                     |                                            | 0.5                                          |
| 5(1) 3(1)     | 3147.4                                   | 3057.6                                     |                                            | 0.3                                          |
| 5(1) 4(1)     | 2696.4                                   | 2614.3                                     |                                            | 0.4                                          |
| 6(1) 1(1)     | 4901.0                                   | 4661.6                                     |                                            | 0.1                                          |
| 6(1) 2(1)     | 4065.4                                   | 3857.7                                     |                                            | 0.9                                          |
| 6(1) 3(1)     | 2982.9                                   | 2911.4                                     |                                            | 0.4                                          |
| 6(1) 4(1)     | 2532.0                                   | 2466.7                                     |                                            | 0.4                                          |
| 6(1) 5(1)     | 2387.4                                   | 2294.1                                     |                                            | 5.7                                          |
| 7(1) 1(1)     | 4826.4                                   | 4605.9                                     |                                            | 0.0                                          |
| 7(1) 2(1)     | 3990.7                                   | 3780.4                                     |                                            | 0.3                                          |
| 7(1) 3(1)     | 2908.3                                   | 2848.6                                     |                                            | 0.3                                          |
| 7(1) 4(1)     | 2457.4                                   | 2410.2                                     |                                            | 0.0                                          |
| 7(1) 5(1)     | 2312.8                                   | 2240.7                                     |                                            | 0.0                                          |
| 7(1) 6(1)     | 2148.3                                   | 2094.8                                     |                                            | 0.1                                          |

|      |      |        |        |     |
|------|------|--------|--------|-----|
| 8(1) | 1(1) | 4451.7 | 4238.5 | 0.4 |
| 8(1) | 2(1) | 3616.0 | 3431.8 | 0.1 |
| 8(1) | 3(1) | 2533.6 | 2484.9 | 0.0 |
| 8(1) | 4(1) | 2082.7 | 2043.3 | 0.0 |
| 8(1) | 5(1) | 1938.1 | 1876.7 | 0.4 |
| 8(1) | 6(1) | 1773.6 | 1728.5 | 6.6 |
| 8(1) | 7(1) | 1699.0 | 1671.2 | 0.0 |
| 9(1) | 1(1) | 4323.9 | 4006.7 | 0.4 |
| 9(1) | 2(1) | 3488.2 | 3223.3 | 0.0 |
| 9(1) | 3(1) | 2405.8 | 2277.0 | 0.0 |
| 9(1) | 4(1) | 1954.9 | 1830.2 | 0.0 |
| 9(1) | 5(1) | 1810.3 | 1651.5 | 0.4 |
| 9(1) | 6(1) | 1645.9 | 1516.0 | 0.0 |
| 9(1) | 7(1) | 1571.2 | 1463.8 | 1.5 |
| 9(1) | 8(1) | 1196.5 | 1094.4 | 0.0 |

**Table S9.** Harmonic and anharmonic vibrational frequencies and their intensities of *trans*-AA as computed at the B3LYP/cc-pVTZ level of theory.

| Mode (quanta) | $\nu_{\text{harm}}$ (cm <sup>-1</sup> ) | $\nu_{\text{anharm}}$ (cm <sup>-1</sup> ) | $I_{\text{harm}}$ (km mol <sup>-1</sup> ) | $I_{\text{anharm}}$ (km mol <sup>-1</sup> ) |
|---------------|-----------------------------------------|-------------------------------------------|-------------------------------------------|---------------------------------------------|
| 1(1)          | 3744.4                                  | 3546.1                                    | 55.3                                      | 45.1                                        |
| 2(1)          | 3161.8                                  | 3007.1                                    | 5.1                                       | 4.1                                         |
| 3(1)          | 3053.3                                  | 2944.5                                    | 1.8                                       | 1.9                                         |
| 4(1)          | 1825.1                                  | 1791.3                                    | 313.3                                     | 278.3                                       |
| 5(1)          | 1473.1                                  | 1434.0                                    | 15.5                                      | 12.1                                        |
| 6(1)          | 1409.2                                  | 1374.8                                    | 53.2                                      | 32.9                                        |
| 7(1)          | 1342.6                                  | 1331.4                                    | 26.9                                      | 37.3                                        |
| 8(1)          | 1205.4                                  | 1165.3                                    | 210.7                                     | 190.9                                       |
| 9(1)          | 999.1                                   | 978.1                                     | 72.6                                      | 74.6                                        |
| 10(1)         | 860.2                                   | 842.7                                     | 3.4                                       | 3.2                                         |
| 11(1)         | 585.4                                   | 577.7                                     | 38.5                                      | 33.2                                        |
| 12(1)         | 423.0                                   | 424.3                                     | 4.3                                       | 4.5                                         |
| 13(1)         | 3110.0                                  | 2964.0                                    | 4.5                                       | 5.8                                         |
| 14(1)         | 1478.5                                  | 1426.3                                    | 8.4                                       | 6.9                                         |
| 15(1)         | 1070.3                                  | 1053.7                                    | 7.6                                       | 7.1                                         |
| 16(1)         | 670.6                                   | 655.3                                     | 90.6                                      | 69.8                                        |
| 17(1)         | 546.4                                   | 536.6                                     | 25.2                                      | 32.6                                        |
| 18(1)         | 73.2                                    | 64.9                                      | 0.3                                       | 0.1                                         |
| 1(2)          | 7488.8                                  | 6914.6                                    |                                           | 4.0                                         |
| 2(2)          | 6323.6                                  | 5924.6                                    |                                           | 0.4                                         |
| 3(2)          | 6106.7                                  | 5819.4                                    |                                           | 0.1                                         |
| 4(2)          | 3650.2                                  | 3563.5                                    |                                           | 3.0                                         |
| 5(2)          | 2946.2                                  | 2848.6                                    |                                           | 0.1                                         |
| 6(2)          | 2818.3                                  | 2734.4                                    |                                           | 0.1                                         |
| 7(2)          | 2685.1                                  | 2600.4                                    |                                           | 0.1                                         |
| 8(2)          | 2410.7                                  | 2320.6                                    |                                           | 0.6                                         |
| 9(2)          | 1998.2                                  | 1953.9                                    |                                           | 1.4                                         |
| 10(2)         | 1720.4                                  | 1679.2                                    |                                           | 5.0                                         |
| 11(2)         | 1170.8                                  | 1156.1                                    |                                           | 0.1                                         |
| 12(2)         | 845.9                                   | 849.8                                     |                                           | 0.2                                         |

|            |        |        |      |
|------------|--------|--------|------|
| 13(2)      | 6220.0 | 5873.4 | 0.3  |
| 14(2)      | 2957.1 | 2860.0 | 0.3  |
| 15(2)      | 2140.7 | 2091.2 | 0.1  |
| 16(2)      | 1341.2 | 1273.2 | 18.9 |
| 17(2)      | 1092.8 | 1071.5 | 0.9  |
| 18(2)      | 146.3  | 120.7  | 0.1  |
| 2(1) 1(1)  | 6906.2 | 6553.1 | 0.0  |
| 3(1) 1(1)  | 6797.8 | 6476.7 | 0.0  |
| 3(1) 2(1)  | 6215.1 | 5895.2 | 0.1  |
| 4(1) 1(1)  | 5569.5 | 5335.9 | 0.7  |
| 4(1) 2(1)  | 4986.9 | 4796.7 | 0.2  |
| 4(1) 3(1)  | 4878.4 | 4720.5 | 0.1  |
| 5(1) 1(1)  | 5217.5 | 4980.2 | 0.0  |
| 5(1) 2(1)  | 4634.9 | 4429.6 | 0.5  |
| 5(1) 3(1)  | 4526.5 | 4343.4 | 0.0  |
| 5(1) 4(1)  | 3298.2 | 3224.4 | 0.1  |
| 6(1) 1(1)  | 5153.6 | 4917.5 | 0.2  |
| 6(1) 2(1)  | 4571.0 | 4377.4 | 0.2  |
| 6(1) 3(1)  | 4462.5 | 4316.4 | 0.0  |
| 6(1) 4(1)  | 3234.3 | 3164.7 | 0.1  |
| 6(1) 5(1)  | 2882.3 | 2805.2 | 0.3  |
| 7(1) 1(1)  | 5087.0 | 4836.2 | 0.5  |
| 7(1) 2(1)  | 4504.4 | 4306.4 | 0.1  |
| 7(1) 3(1)  | 4395.9 | 4233.8 | 0.2  |
| 7(1) 4(1)  | 3167.7 | 3093.4 | 0.7  |
| 7(1) 5(1)  | 2815.7 | 2736.5 | 0.0  |
| 7(1) 6(1)  | 2751.7 | 2671.8 | 0.4  |
| 8(1) 1(1)  | 4949.8 | 4704.3 | 0.4  |
| 8(1) 2(1)  | 4367.2 | 4168.9 | 0.1  |
| 8(1) 3(1)  | 4258.7 | 4095.2 | 0.2  |
| 8(1) 4(1)  | 3030.5 | 2951.9 | 1.0  |
| 8(1) 5(1)  | 2678.5 | 2597.2 | 0.1  |
| 8(1) 6(1)  | 2614.5 | 2535.9 | 0.2  |
| 8(1) 7(1)  | 2547.9 | 2458.7 | 1.6  |
| 9(1) 1(1)  | 4743.5 | 4522.8 | 0.1  |
| 9(1) 2(1)  | 4160.9 | 3980.4 | 0.1  |
| 9(1) 3(1)  | 4052.5 | 3905.5 | 0.1  |
| 9(1) 4(1)  | 2824.2 | 2766.9 | 0.0  |
| 9(1) 5(1)  | 2472.2 | 2410.3 | 0.1  |
| 9(1) 6(1)  | 2408.3 | 2349.5 | 0.5  |
| 9(1) 7(1)  | 2341.7 | 2278.6 | 0.5  |
| 9(1) 8(1)  | 2204.5 | 2139.2 | 2.2  |
| 10(1) 1(1) | 4604.6 | 4386.0 | 0.1  |
| 10(1) 2(1) | 4022.0 | 3850.2 | 0.0  |
| 10(1) 3(1) | 3913.5 | 3773.4 | 0.0  |
| 10(1) 4(1) | 2685.3 | 2636.4 | 0.4  |
| 10(1) 5(1) | 2333.3 | 2276.1 | 0.0  |
| 10(1) 6(1) | 2269.3 | 2208.3 | 0.8  |
| 10(1) 7(1) | 2202.7 | 2142.4 | 0.0  |
| 10(1) 8(1) | 2065.5 | 2003.7 | 1.6  |
| 10(1) 9(1) | 1859.3 | 1818.2 | 1.3  |



|       |       |        |        |      |
|-------|-------|--------|--------|------|
| 11(1) | 1(1)  | 4329.8 | 4121.5 | 0.1  |
| 11(1) | 2(1)  | 3747.2 | 3585.0 | 0.0  |
| 11(1) | 3(1)  | 3638.8 | 3508.2 | 0.0  |
| 11(1) | 4(1)  | 2410.5 | 2363.3 | 0.1  |
| 11(1) | 5(1)  | 2058.5 | 2011.5 | 0.0  |
| 11(1) | 6(1)  | 1994.6 | 1947.5 | 0.2  |
| 11(1) | 7(1)  | 1928.0 | 1880.1 | 2.1  |
| 11(1) | 8(1)  | 1790.8 | 1740.7 | 1.8  |
| 11(1) | 9(1)  | 1584.5 | 1555.7 | 0.1  |
| 11(1) | 10(1) | 1445.6 | 1423.6 | 10.9 |
| 12(1) | 1(1)  | 4167.4 | 3969.2 | 0.1  |
| 12(1) | 2(1)  | 3584.8 | 3431.4 | 0.1  |
| 12(1) | 3(1)  | 3476.3 | 3354.9 | 0.0  |
| 12(1) | 4(1)  | 2248.1 | 2213.8 | 0.2  |
| 12(1) | 5(1)  | 1896.1 | 1860.6 | 0.0  |
| 12(1) | 6(1)  | 1832.1 | 1798.8 | 13.1 |
| 12(1) | 7(1)  | 1765.5 | 1727.5 | 0.7  |
| 12(1) | 8(1)  | 1628.3 | 1588.4 | 0.6  |
| 12(1) | 9(1)  | 1422.1 | 1399.7 | 1.9  |
| 12(1) | 10(1) | 1283.1 | 1265.0 | 0.1  |
| 12(1) | 11(1) | 1008.4 | 1002.8 | 0.2  |
| 13(1) | 1(1)  | 6854.4 | 6515.3 | 0.0  |
| 13(1) | 2(1)  | 6271.8 | 5955.2 | 0.2  |
| 13(1) | 3(1)  | 6163.3 | 5800.0 | 0.2  |
| 13(1) | 4(1)  | 4935.1 | 4758.9 | 0.0  |
| 13(1) | 5(1)  | 4583.1 | 4386.4 | 0.1  |
| 13(1) | 6(1)  | 4519.2 | 4338.5 | 0.1  |
| 13(1) | 7(1)  | 4452.6 | 4270.1 | 0.4  |
| 13(1) | 8(1)  | 4315.4 | 4134.0 | 0.2  |
| 13(1) | 9(1)  | 4109.1 | 3942.3 | 0.0  |
| 13(1) | 10(1) | 3970.2 | 3812.8 | 0.0  |
| 13(1) | 11(1) | 3695.4 | 3546.8 | 0.0  |
| 13(1) | 12(1) | 3533.0 | 3393.3 | 0.0  |
| 14(1) | 1(1)  | 5223.0 | 4982.2 | 0.0  |
| 14(1) | 2(1)  | 4640.3 | 4425.2 | 0.2  |
| 14(1) | 3(1)  | 4531.9 | 4365.9 | 0.2  |
| 14(1) | 4(1)  | 3303.6 | 3226.7 | 0.0  |
| 14(1) | 5(1)  | 2951.7 | 2864.7 | 0.0  |
| 14(1) | 6(1)  | 2887.7 | 2806.4 | 0.2  |
| 14(1) | 7(1)  | 2821.1 | 2739.7 | 0.0  |
| 14(1) | 8(1)  | 2683.9 | 2599.8 | 0.0  |
| 14(1) | 9(1)  | 2477.7 | 2406.8 | 0.1  |
| 14(1) | 10(1) | 2338.7 | 2278.2 | 0.0  |
| 14(1) | 11(1) | 2064.0 | 2013.8 | 0.0  |
| 14(1) | 12(1) | 1901.5 | 1860.7 | 0.0  |
| 14(1) | 13(1) | 4588.5 | 4396.5 | 0.2  |
| 15(1) | 1(1)  | 4814.7 | 4592.8 | 0.0  |
| 15(1) | 2(1)  | 4232.1 | 4050.4 | 0.0  |
| 15(1) | 3(1)  | 4123.7 | 3970.9 | 0.3  |
| 15(1) | 4(1)  | 2895.4 | 2835.3 | 0.0  |
| 15(1) | 5(1)  | 2543.5 | 2475.4 | 0.0  |

|       |       |        |        |      |
|-------|-------|--------|--------|------|
| 15(1) | 6(1)  | 2479.5 | 2418.0 | 0.2  |
| 15(1) | 7(1)  | 2412.9 | 2349.4 | 0.1  |
| 15(1) | 8(1)  | 2275.7 | 2210.9 | 0.0  |
| 15(1) | 9(1)  | 2069.4 | 2024.4 | 0.0  |
| 15(1) | 10(1) | 1930.5 | 1887.7 | 0.0  |
| 15(1) | 11(1) | 1655.7 | 1624.4 | 0.0  |
| 15(1) | 12(1) | 1493.3 | 1475.4 | 0.0  |
| 15(1) | 13(1) | 4180.3 | 4008.5 | 0.1  |
| 15(1) | 14(1) | 2548.9 | 2478.1 | 0.1  |
| 16(1) | 1(1)  | 4415.0 | 4199.4 | 0.5  |
| 16(1) | 2(1)  | 3832.4 | 3661.7 | 0.0  |
| 16(1) | 3(1)  | 3723.9 | 3584.8 | 0.0  |
| 16(1) | 4(1)  | 2495.7 | 2445.2 | 0.0  |
| 16(1) | 5(1)  | 2143.7 | 2088.7 | 0.0  |
| 16(1) | 6(1)  | 2079.7 | 2034.4 | 0.0  |
| 16(1) | 7(1)  | 2013.1 | 1955.2 | 0.0  |
| 16(1) | 8(1)  | 1875.9 | 1810.3 | 0.0  |
| 16(1) | 9(1)  | 1669.7 | 1633.0 | 0.0  |
| 16(1) | 10(1) | 1530.8 | 1496.5 | 0.0  |
| 16(1) | 11(1) | 1256.0 | 1235.2 | 0.0  |
| 16(1) | 12(1) | 1093.5 | 1080.1 | 0.0  |
| 16(1) | 13(1) | 3780.6 | 3623.1 | 0.1  |
| 16(1) | 14(1) | 2149.1 | 2090.1 | 0.0  |
| 16(1) | 15(1) | 1740.9 | 1702.3 | 0.2  |
| 17(1) | 1(1)  | 4290.8 | 4079.7 | 0.5  |
| 17(1) | 2(1)  | 3708.2 | 3542.9 | 0.0  |
| 17(1) | 3(1)  | 3599.7 | 3467.0 | 0.0  |
| 17(1) | 4(1)  | 2371.5 | 2326.5 | 0.1  |
| 17(1) | 5(1)  | 2019.5 | 1968.8 | 0.0  |
| 17(1) | 6(1)  | 1955.6 | 1911.5 | 0.0  |
| 17(1) | 7(1)  | 1889.0 | 1841.3 | 0.0  |
| 17(1) | 8(1)  | 1751.8 | 1701.3 | 0.1  |
| 17(1) | 9(1)  | 1545.5 | 1518.4 | 0.7  |
| 17(1) | 10(1) | 1406.6 | 1377.9 | 0.0  |
| 17(1) | 11(1) | 1131.8 | 1113.4 | 0.0  |
| 17(1) | 12(1) | 969.4  | 962.3  | 0.0  |
| 17(1) | 13(1) | 3656.4 | 3505.7 | 0.1  |
| 17(1) | 14(1) | 2024.9 | 1968.8 | 0.1  |
| 17(1) | 15(1) | 1616.7 | 1584.9 | 0.3  |
| 17(1) | 16(1) | 1217.0 | 1184.4 | 3.1  |
| 18(1) | 1(1)  | 3817.6 | 3608.4 | 0.0  |
| 18(1) | 2(1)  | 3235.0 | 3058.8 | 0.1  |
| 18(1) | 3(1)  | 3126.5 | 3000.4 | 0.0  |
| 18(1) | 4(1)  | 1898.3 | 1854.8 | 0.0  |
| 18(1) | 5(1)  | 1546.3 | 1497.6 | 0.9  |
| 18(1) | 6(1)  | 1482.3 | 1446.5 | 0.1  |
| 18(1) | 7(1)  | 1415.7 | 1370.1 | 0.0  |
| 18(1) | 8(1)  | 1278.5 | 1228.5 | 0.1  |
| 18(1) | 9(1)  | 1072.3 | 1039.3 | 0.1  |
| 18(1) | 10(1) | 933.4  | 908.3  | 0.1  |
| 18(1) | 11(1) | 658.6  | 638.3  | 11.6 |

|       |       |        |        |     |
|-------|-------|--------|--------|-----|
| 18(1) | 12(1) | 496.1  | 492.4  | 0.3 |
| 18(1) | 13(1) | 3183.2 | 3043.8 | 2.7 |
| 18(1) | 14(1) | 1551.7 | 1501.7 | 0.4 |
| 18(1) | 15(1) | 1143.5 | 1106.7 | 1.3 |
| 18(1) | 16(1) | 743.7  | 733.5  | 0.1 |
| 18(1) | 17(1) | 619.6  | 600.0  | 3.3 |

**Table S10.** Harmonic and anharmonic vibrational frequencies and their intensities of *cis*-AA as computed at the B3LYP/cc-pVTZ level of theory.

| Mode (quanta) | $\nu_{\text{harm}}$ ( $\text{cm}^{-1}$ ) | $\nu_{\text{anharm}}$ ( $\text{cm}^{-1}$ ) | $I_{\text{harm}}$ ( $\text{km mol}^{-1}$ ) | $I_{\text{anharm}}$ ( $\text{km mol}^{-1}$ ) |
|---------------|------------------------------------------|--------------------------------------------|--------------------------------------------|----------------------------------------------|
| 1(1)          | 3800.6                                   | 3607.8                                     | 42.7                                       | 34.1                                         |
| 2(1)          | 3156.1                                   | 3007.9                                     | 4.0                                        | 4.5                                          |
| 3(1)          | 3035.0                                   | 2935.5                                     | 4.7                                        | 5.9                                          |
| 4(1)          | 1860.1                                   | 1824.3                                     | 275.1                                      | 233.9                                        |
| 5(1)          | 1474.5                                   | 1433.3                                     | 6.2                                        | 6.9                                          |
| 6(1)          | 1395.8                                   | 1364.9                                     | 47.4                                       | 30.3                                         |
| 7(1)          | 1297.3                                   | 1247.8                                     | 383.7                                      | 389.7                                        |
| 8(1)          | 1204.8                                   | 1163.6                                     | 4.6                                        | 1.7                                          |
| 9(1)          | 987.7                                    | 972.0                                      | 11.6                                       | 10.8                                         |
| 10(1)         | 855.6                                    | 834.7                                      | 27.5                                       | 29.1                                         |
| 11(1)         | 598.9                                    | 591.5                                      | 6.3                                        | 5.2                                          |
| 12(1)         | 431.5                                    | 435.3                                      | 4.0                                        | 3.9                                          |
| 13(1)         | 3090.0                                   | 2948.8                                     | 7.8                                        | 9.3                                          |
| 14(1)         | 1487.8                                   | 1447.3                                     | 7.8                                        | 6.0                                          |
| 15(1)         | 1064.7                                   | 1038.8                                     | 4.9                                        | 4.7                                          |
| 16(1)         | 598.8                                    | 590.6                                      | 1.7                                        | 0.5                                          |
| 17(1)         | 474.1                                    | 457.6                                      | 97.1                                       | 93.2                                         |
| 18(1)         | 112.1                                    | 53.1                                       | 0.3                                        | 0.3                                          |
| 1(2)          | 7601.3                                   | 7043.4                                     |                                            | 3.9                                          |
| 2(2)          | 6312.3                                   | 5916.7                                     |                                            | 0.4                                          |
| 3(2)          | 6069.9                                   | 5763.0                                     |                                            | 0.1                                          |
| 4(2)          | 3720.2                                   | 3629.4                                     |                                            | 4.6                                          |
| 5(2)          | 2948.9                                   | 2840.6                                     |                                            | 0.0                                          |
| 6(2)          | 2791.6                                   | 2712.7                                     |                                            | 0.1                                          |
| 7(2)          | 2594.6                                   | 2481.7                                     |                                            | 0.4                                          |
| 8(2)          | 2409.7                                   | 2329.0                                     |                                            | 0.1                                          |
| 9(2)          | 1975.3                                   | 1930.0                                     |                                            | 2.9                                          |
| 10(2)         | 1711.1                                   | 1663.4                                     |                                            | 1.5                                          |
| 11(2)         | 1197.8                                   | 1182.6                                     |                                            | 0.8                                          |
| 12(2)         | 863.1                                    | 871.9                                      |                                            | 0.1                                          |
| 13(2)         | 6180.0                                   | 5832.5                                     |                                            | 0.3                                          |
| 14(2)         | 2975.7                                   | 2883.2                                     |                                            | 0.1                                          |
| 15(2)         | 2129.3                                   | 2074.8                                     |                                            | 0.1                                          |
| 16(2)         | 1197.7                                   | 1185.9                                     |                                            | 3.2                                          |
| 17(2)         | 948.3                                    | 906.4                                      |                                            | 6.9                                          |
| 18(2)         | 224.2                                    | 48.9                                       |                                            | 0.0                                          |
| 2(1) 1(1)     | 6956.8                                   | 6615.3                                     |                                            | 0.0                                          |
| 3(1) 1(1)     | 6835.6                                   | 6512.1                                     |                                            | 0.0                                          |
| 3(1) 2(1)     | 6191.1                                   | 5883.2                                     |                                            | 0.1                                          |

|       |      |        |        |      |
|-------|------|--------|--------|------|
| 4(1)  | 1(1) | 5660.7 | 5428.9 | 0.1  |
| 4(1)  | 2(1) | 5016.2 | 4831.6 | 0.2  |
| 4(1)  | 3(1) | 4895.0 | 4727.7 | 0.1  |
| 5(1)  | 1(1) | 5275.1 | 5041.1 | 0.1  |
| 5(1)  | 2(1) | 4630.6 | 4429.4 | 0.4  |
| 5(1)  | 3(1) | 4509.4 | 4316.2 | 0.1  |
| 5(1)  | 4(1) | 3334.5 | 3256.8 | 0.1  |
| 6(1)  | 1(1) | 5196.4 | 4972.3 | 0.0  |
| 6(1)  | 2(1) | 4551.9 | 4366.8 | 0.2  |
| 6(1)  | 3(1) | 4430.7 | 4279.5 | 0.1  |
| 6(1)  | 4(1) | 3255.9 | 3188.7 | 0.0  |
| 6(1)  | 5(1) | 2870.2 | 2793.9 | 0.2  |
| 7(1)  | 1(1) | 5097.9 | 4853.1 | 1.0  |
| 7(1)  | 2(1) | 4453.4 | 4255.2 | 0.1  |
| 7(1)  | 3(1) | 4332.2 | 4153.9 | 0.2  |
| 7(1)  | 4(1) | 3157.4 | 3071.1 | 1.0  |
| 7(1)  | 5(1) | 2771.7 | 2681.9 | 0.1  |
| 7(1)  | 6(1) | 2693.1 | 2612.8 | 0.1  |
| 8(1)  | 1(1) | 5005.5 | 4765.2 | 0.2  |
| 8(1)  | 2(1) | 4361.0 | 4171.2 | 0.1  |
| 8(1)  | 3(1) | 4239.8 | 4072.2 | 0.2  |
| 8(1)  | 4(1) | 3064.9 | 2987.2 | 0.4  |
| 8(1)  | 5(1) | 2679.3 | 2598.9 | 0.1  |
| 8(1)  | 6(1) | 2600.6 | 2530.8 | 0.2  |
| 8(1)  | 7(1) | 2502.1 | 2401.0 | 3.0  |
| 9(1)  | 1(1) | 4788.3 | 4572.7 | 0.1  |
| 9(1)  | 2(1) | 4143.8 | 3969.0 | 0.0  |
| 9(1)  | 3(1) | 4022.6 | 3868.1 | 0.1  |
| 9(1)  | 4(1) | 2847.7 | 2786.1 | 0.1  |
| 9(1)  | 5(1) | 2462.1 | 2397.4 | 0.2  |
| 9(1)  | 6(1) | 2383.4 | 2328.9 | 0.3  |
| 9(1)  | 7(1) | 2284.9 | 2210.2 | 1.8  |
| 9(1)  | 8(1) | 2192.5 | 2131.2 | 1.2  |
| 10(1) | 1(1) | 4656.2 | 4441.6 | 0.0  |
| 10(1) | 2(1) | 4011.7 | 3842.8 | 0.0  |
| 10(1) | 3(1) | 3890.5 | 3739.7 | 0.0  |
| 10(1) | 4(1) | 2715.6 | 2660.9 | 0.2  |
| 10(1) | 5(1) | 2330.0 | 2267.5 | 0.0  |
| 10(1) | 6(1) | 2251.3 | 2193.9 | 0.8  |
| 10(1) | 7(1) | 2152.8 | 2076.7 | 1.1  |
| 10(1) | 8(1) | 2060.4 | 1997.2 | 0.6  |
| 10(1) | 9(1) | 1843.2 | 1796.3 | 22.9 |
| 11(1) | 1(1) | 4399.5 | 4197.7 | 0.3  |
| 11(1) | 2(1) | 3755.0 | 3599.6 | 0.0  |
| 11(1) | 3(1) | 3633.8 | 3495.9 | 0.0  |
| 11(1) | 4(1) | 2459.0 | 2412.0 | 0.0  |
| 11(1) | 5(1) | 2073.3 | 2024.8 | 0.0  |
| 11(1) | 6(1) | 1994.7 | 1953.9 | 0.2  |
| 11(1) | 7(1) | 1896.2 | 1838.3 | 0.3  |
| 11(1) | 8(1) | 1803.7 | 1756.5 | 6.0  |
| 11(1) | 9(1) | 1586.5 | 1557.0 | 0.1  |

|       |       |        |        |     |
|-------|-------|--------|--------|-----|
| 11(1) | 10(1) | 1454.4 | 1426.2 | 6.7 |
| 12(1) | 1(1)  | 4232.2 | 4043.1 | 0.0 |
| 12(1) | 2(1)  | 3587.7 | 3442.8 | 0.1 |
| 12(1) | 3(1)  | 3466.5 | 3339.9 | 0.0 |
| 12(1) | 4(1)  | 2291.6 | 2258.1 | 0.2 |
| 12(1) | 5(1)  | 1906.0 | 1871.6 | 0.0 |
| 12(1) | 6(1)  | 1827.3 | 1800.8 | 0.2 |
| 12(1) | 7(1)  | 1728.8 | 1682.1 | 1.3 |
| 12(1) | 8(1)  | 1636.4 | 1601.8 | 0.3 |
| 12(1) | 9(1)  | 1419.2 | 1398.7 | 0.5 |
| 12(1) | 10(1) | 1287.1 | 1269.3 | 0.0 |
| 12(1) | 11(1) | 1030.4 | 1027.2 | 0.0 |
| 13(1) | 1(1)  | 6890.6 | 6556.6 | 0.0 |
| 13(1) | 2(1)  | 6246.1 | 5946.3 | 0.1 |
| 13(1) | 3(1)  | 6124.9 | 5747.1 | 0.2 |
| 13(1) | 4(1)  | 4950.1 | 4772.0 | 0.0 |
| 13(1) | 5(1)  | 4564.4 | 4367.5 | 0.1 |
| 13(1) | 6(1)  | 4485.8 | 4305.7 | 0.2 |
| 13(1) | 7(1)  | 4387.3 | 4198.3 | 0.3 |
| 13(1) | 8(1)  | 4294.8 | 4116.9 | 0.2 |
| 13(1) | 9(1)  | 4077.6 | 3911.0 | 0.0 |
| 13(1) | 10(1) | 3945.5 | 3784.9 | 0.0 |
| 13(1) | 11(1) | 3688.9 | 3540.5 | 0.0 |
| 13(1) | 12(1) | 3521.5 | 3384.3 | 0.0 |
| 14(1) | 1(1)  | 5288.5 | 5056.7 | 0.0 |
| 14(1) | 2(1)  | 4644.0 | 4439.6 | 0.2 |
| 14(1) | 3(1)  | 4522.8 | 4337.3 | 0.2 |
| 14(1) | 4(1)  | 3347.9 | 3272.6 | 0.0 |
| 14(1) | 5(1)  | 2962.3 | 2874.6 | 0.2 |
| 14(1) | 6(1)  | 2883.6 | 2809.9 | 0.2 |
| 14(1) | 7(1)  | 2785.1 | 2697.9 | 0.0 |
| 14(1) | 8(1)  | 2692.7 | 2616.0 | 0.0 |
| 14(1) | 9(1)  | 2475.5 | 2410.6 | 0.1 |
| 14(1) | 10(1) | 2343.4 | 2283.1 | 0.0 |
| 14(1) | 11(1) | 2086.7 | 2040.6 | 0.0 |
| 14(1) | 12(1) | 1919.4 | 1885.4 | 0.0 |
| 14(1) | 13(1) | 4577.8 | 4391.0 | 0.2 |
| 15(1) | 1(1)  | 4865.3 | 4646.2 | 0.0 |
| 15(1) | 2(1)  | 4220.8 | 4043.7 | 0.0 |
| 15(1) | 3(1)  | 4099.6 | 3936.5 | 0.3 |
| 15(1) | 4(1)  | 2924.8 | 2860.6 | 0.0 |
| 15(1) | 5(1)  | 2539.1 | 2466.4 | 0.0 |
| 15(1) | 6(1)  | 2460.4 | 2399.7 | 0.1 |
| 15(1) | 7(1)  | 2362.0 | 2286.4 | 0.0 |
| 15(1) | 8(1)  | 2269.5 | 2206.0 | 0.0 |
| 15(1) | 9(1)  | 2052.3 | 2003.5 | 0.0 |
| 15(1) | 10(1) | 1920.2 | 1871.6 | 0.0 |
| 15(1) | 11(1) | 1663.6 | 1629.7 | 0.0 |
| 15(1) | 12(1) | 1496.2 | 1479.9 | 0.0 |
| 15(1) | 13(1) | 4154.6 | 3980.4 | 0.1 |
| 15(1) | 14(1) | 2552.5 | 2482.9 | 0.1 |

|       |       |        |        |     |
|-------|-------|--------|--------|-----|
| 16(1) | 1(1)  | 4399.5 | 4196.2 | 0.1 |
| 16(1) | 2(1)  | 3755.0 | 3597.4 | 0.0 |
| 16(1) | 3(1)  | 3633.8 | 3494.3 | 0.0 |
| 16(1) | 4(1)  | 2458.9 | 2411.3 | 0.0 |
| 16(1) | 5(1)  | 2073.3 | 2022.5 | 0.0 |
| 16(1) | 6(1)  | 1994.6 | 1956.6 | 0.0 |
| 16(1) | 7(1)  | 1896.1 | 1838.3 | 0.1 |
| 16(1) | 8(1)  | 1803.7 | 1757.5 | 0.0 |
| 16(1) | 9(1)  | 1586.5 | 1560.0 | 0.2 |
| 16(1) | 10(1) | 1454.4 | 1423.7 | 0.0 |
| 16(1) | 11(1) | 1197.7 | 1181.4 | 0.0 |
| 16(1) | 12(1) | 1030.4 | 1026.9 | 0.0 |
| 16(1) | 13(1) | 3688.8 | 3538.5 | 0.1 |
| 16(1) | 14(1) | 2086.7 | 2036.3 | 0.1 |
| 16(1) | 15(1) | 1663.5 | 1630.2 | 0.3 |
| 17(1) | 1(1)  | 4274.8 | 4046.5 | 0.5 |
| 17(1) | 2(1)  | 3630.3 | 3465.1 | 0.0 |
| 17(1) | 3(1)  | 3509.1 | 3362.9 | 0.0 |
| 17(1) | 4(1)  | 2334.2 | 2281.9 | 0.0 |
| 17(1) | 5(1)  | 1948.6 | 1889.1 | 0.0 |
| 17(1) | 6(1)  | 1869.9 | 1822.5 | 0.0 |
| 17(1) | 7(1)  | 1771.4 | 1703.1 | 0.2 |
| 17(1) | 8(1)  | 1679.0 | 1629.4 | 0.0 |
| 17(1) | 9(1)  | 1461.8 | 1419.5 | 0.9 |
| 17(1) | 10(1) | 1329.7 | 1291.1 | 0.0 |
| 17(1) | 11(1) | 1073.0 | 1050.8 | 0.2 |
| 17(1) | 12(1) | 905.7  | 891.7  | 0.0 |
| 17(1) | 13(1) | 3564.1 | 3407.3 | 0.0 |
| 17(1) | 14(1) | 1962.0 | 1908.2 | 0.0 |
| 17(1) | 15(1) | 1538.8 | 1497.5 | 1.0 |
| 17(1) | 16(1) | 1073.0 | 1044.1 | 1.3 |
| 18(1) | 1(1)  | 3912.7 | 3662.9 | 0.0 |
| 18(1) | 2(1)  | 3268.2 | 3055.7 | 0.0 |
| 18(1) | 3(1)  | 3147.0 | 2960.2 | 0.0 |
| 18(1) | 4(1)  | 1972.2 | 1874.9 | 0.0 |
| 18(1) | 5(1)  | 1586.5 | 1482.4 | 0.7 |
| 18(1) | 6(1)  | 1507.9 | 1415.5 | 0.1 |
| 18(1) | 7(1)  | 1409.4 | 1302.3 | 0.0 |
| 18(1) | 8(1)  | 1316.9 | 1219.1 | 0.0 |
| 18(1) | 9(1)  | 1099.7 | 1023.0 | 0.7 |
| 18(1) | 10(1) | 967.6  | 886.0  | 0.0 |
| 18(1) | 11(1) | 711.0  | 643.0  | 0.0 |
| 18(1) | 12(1) | 543.6  | 499.2  | 0.1 |
| 18(1) | 13(1) | 3202.1 | 3006.4 | 1.6 |
| 18(1) | 14(1) | 1599.9 | 1500.6 | 0.7 |
| 18(1) | 15(1) | 1176.7 | 1084.3 | 0.7 |
| 18(1) | 16(1) | 710.9  | 642.7  | 0.1 |
| 18(1) | 17(1) | 586.2  | 509.7  | 0.5 |

**Table S11.** Harmonic and anharmonic vibrational frequencies and their intensities of glycine conformer **I** as computed at the B3LYP/cc-pVTZ level of theory.

| Mode (quanta) | $\nu_{\text{harm}}$ ( $\text{cm}^{-1}$ ) | $\nu_{\text{anharm}}$ ( $\text{cm}^{-1}$ ) | $I_{\text{harm}}$ ( $\text{km mol}^{-1}$ ) | $I_{\text{anharm}}$ ( $\text{km mol}^{-1}$ ) |
|---------------|------------------------------------------|--------------------------------------------|--------------------------------------------|----------------------------------------------|
| 1(1)          | 3738.9                                   | 3533.4                                     | 53.4                                       | 40.5                                         |
| 2(1)          | 3499.7                                   | 3358.4                                     | 1.3                                        | 0.4                                          |
| 3(1)          | 3040.0                                   | 2924.2                                     | 17.9                                       | 18.5                                         |
| 4(1)          | 1820.2                                   | 1784.2                                     | 278.5                                      | 236.0                                        |
| 5(1)          | 1677.3                                   | 1654.6                                     | 18.5                                       | 19.5                                         |
| 6(1)          | 1458.8                                   | 1429.0                                     | 14.6                                       | 8.5                                          |
| 7(1)          | 1398.7                                   | 1360.9                                     | 15.5                                       | 12.3                                         |
| 8(1)          | 1311.3                                   | 1277.7                                     | 11.6                                       | 19.2                                         |
| 9(1)          | 1161.3                                   | 1115.5                                     | 111.8                                      | 57.2                                         |
| 10(1)         | 1123.7                                   | 1084.4                                     | 181.4                                      | 183.9                                        |
| 11(1)         | 922.0                                    | 841.6                                      | 137.7                                      | 55.7                                         |
| 12(1)         | 821.6                                    | 783.8                                      | 83.5                                       | 157.0                                        |
| 13(1)         | 637.6                                    | 628.9                                      | 6.7                                        | 3.4                                          |
| 14(1)         | 463.5                                    | 454.7                                      | 28.6                                       | 28.2                                         |
| 15(1)         | 259.6                                    | 248.9                                      | 9.6                                        | 10.0                                         |
| 16(1)         | 3568.3                                   | 3399.9                                     | 3.3                                        | 1.3                                          |
| 17(1)         | 3069.6                                   | 2917.0                                     | 7.6                                        | 10.2                                         |
| 18(1)         | 1387.0                                   | 1346.9                                     | 0.1                                        | 0.0                                          |
| 19(1)         | 1188.3                                   | 1156.1                                     | 1.2                                        | 0.2                                          |
| 20(1)         | 920.5                                    | 905.2                                      | 3.5                                        | 4.6                                          |
| 21(1)         | 658.1                                    | 603.9                                      | 89.0                                       | 64.4                                         |
| 22(1)         | 510.4                                    | 484.5                                      | 30.8                                       | 52.6                                         |
| 23(1)         | 215.5                                    | 17.9                                       | 42.1                                       | 5.0                                          |
| 24(1)         | 57.7                                     | 69.0                                       | 5.5                                        | 35.9                                         |
| 1(2)          | 7477.7                                   | 6885.2                                     |                                            | 5.0                                          |
| 2(2)          | 6999.4                                   | 6583.2                                     |                                            | 1.0                                          |
| 3(2)          | 6080.0                                   | 5732.5                                     |                                            | 0.2                                          |
| 4(2)          | 3640.5                                   | 3548.3                                     |                                            | 2.7                                          |
| 5(2)          | 3354.5                                   | 3218.5                                     |                                            | 0.0                                          |
| 6(2)          | 2917.7                                   | 2827.1                                     |                                            | 0.3                                          |
| 7(2)          | 2797.5                                   | 2701.9                                     |                                            | 0.5                                          |
| 8(2)          | 2622.6                                   | 2521.7                                     |                                            | 0.3                                          |
| 9(2)          | 2322.6                                   | 2225.0                                     |                                            | 0.4                                          |
| 10(2)         | 2247.4                                   | 2162.0                                     |                                            | 0.9                                          |
| 11(2)         | 1843.9                                   | 1658.7                                     |                                            | 1.4                                          |
| 12(2)         | 1643.1                                   | 1557.5                                     |                                            | 0.4                                          |
| 13(2)         | 1275.3                                   | 1257.8                                     |                                            | 0.1                                          |
| 14(2)         | 926.9                                    | 910.6                                      |                                            | 33.4                                         |
| 15(2)         | 519.2                                    | 497.7                                      |                                            | 0.2                                          |
| 16(2)         | 7136.7                                   | 6711.9                                     |                                            | 0.8                                          |
| 17(2)         | 6139.2                                   | 5777.1                                     |                                            | 0.4                                          |
| 18(2)         | 2774.0                                   | 2689.9                                     |                                            | 0.0                                          |
| 19(2)         | 2376.5                                   | 2309.9                                     |                                            | 0.1                                          |
| 20(2)         | 1841.0                                   | 1812.1                                     |                                            | 12.3                                         |
| 21(2)         | 1316.2                                   | 1168.7                                     |                                            | 7.8                                          |
| 22(2)         | 1020.9                                   | 970.0                                      |                                            | 1.0                                          |
| 23(2)         | 431.0                                    | -91.7                                      |                                            | 0.2                                          |
| 24(2)         | 115.4                                    | 173.1                                      |                                            | 0.5                                          |

|       |      |        |        |     |
|-------|------|--------|--------|-----|
| 2(1)  | 1(1) | 7238.5 | 6863.4 | 0.0 |
| 3(1)  | 1(1) | 6778.8 | 6430.1 | 0.0 |
| 3(1)  | 2(1) | 6539.7 | 6225.6 | 0.0 |
| 4(1)  | 1(1) | 5559.1 | 5316.2 | 0.7 |
| 4(1)  | 2(1) | 5319.9 | 5114.5 | 0.0 |
| 4(1)  | 3(1) | 4860.2 | 4679.1 | 0.0 |
| 5(1)  | 1(1) | 5416.1 | 5158.7 | 0.0 |
| 5(1)  | 2(1) | 5176.9 | 4919.7 | 0.0 |
| 5(1)  | 3(1) | 4717.2 | 4519.0 | 0.0 |
| 5(1)  | 4(1) | 3497.5 | 3409.1 | 0.3 |
| 6(1)  | 1(1) | 5197.7 | 4962.6 | 0.0 |
| 6(1)  | 2(1) | 4958.5 | 4758.3 | 0.0 |
| 6(1)  | 3(1) | 4498.8 | 4293.8 | 0.2 |
| 6(1)  | 4(1) | 3279.1 | 3212.4 | 0.0 |
| 6(1)  | 5(1) | 3136.1 | 3054.4 | 0.0 |
| 7(1)  | 1(1) | 5137.6 | 4886.0 | 0.4 |
| 7(1)  | 2(1) | 4898.4 | 4687.8 | 0.1 |
| 7(1)  | 3(1) | 4438.7 | 4265.8 | 0.2 |
| 7(1)  | 4(1) | 3219.0 | 3140.9 | 0.0 |
| 7(1)  | 5(1) | 3076.0 | 2984.8 | 1.7 |
| 7(1)  | 6(1) | 2857.6 | 2786.1 | 0.2 |
| 8(1)  | 1(1) | 5050.1 | 4783.9 | 0.6 |
| 8(1)  | 2(1) | 4811.0 | 4595.1 | 0.1 |
| 8(1)  | 3(1) | 4351.3 | 4164.1 | 0.0 |
| 8(1)  | 4(1) | 3131.5 | 3046.0 | 0.5 |
| 8(1)  | 5(1) | 2988.5 | 2889.5 | 0.1 |
| 8(1)  | 6(1) | 2770.1 | 2693.7 | 0.0 |
| 8(1)  | 7(1) | 2710.0 | 2611.6 | 0.3 |
| 9(1)  | 1(1) | 4900.1 | 4647.1 | 0.0 |
| 9(1)  | 2(1) | 4661.0 | 4444.6 | 0.2 |
| 9(1)  | 3(1) | 4201.3 | 4011.1 | 0.4 |
| 9(1)  | 4(1) | 2981.5 | 2898.4 | 0.3 |
| 9(1)  | 5(1) | 2838.5 | 2738.7 | 0.1 |
| 9(1)  | 6(1) | 2620.1 | 2543.9 | 0.1 |
| 9(1)  | 7(1) | 2560.0 | 2468.2 | 0.3 |
| 9(1)  | 8(1) | 2472.6 | 2373.7 | 0.8 |
| 10(1) | 1(1) | 4862.6 | 4616.5 | 0.0 |
| 10(1) | 2(1) | 4623.4 | 4413.1 | 0.0 |
| 10(1) | 3(1) | 4163.7 | 3982.0 | 0.1 |
| 10(1) | 4(1) | 2943.9 | 2866.9 | 0.5 |
| 10(1) | 5(1) | 2801.0 | 2707.6 | 0.1 |
| 10(1) | 6(1) | 2582.6 | 2511.9 | 0.0 |
| 10(1) | 7(1) | 2522.5 | 2438.4 | 0.6 |
| 10(1) | 8(1) | 2435.0 | 2342.0 | 0.7 |
| 10(1) | 9(1) | 2285.0 | 2188.4 | 1.5 |
| 11(1) | 1(1) | 4660.8 | 4373.9 | 0.1 |
| 11(1) | 2(1) | 4421.7 | 4181.5 | 0.3 |
| 11(1) | 3(1) | 3962.0 | 3736.8 | 0.1 |
| 11(1) | 4(1) | 2742.2 | 2626.3 | 0.1 |
| 11(1) | 5(1) | 2599.2 | 2449.2 | 0.0 |
| 11(1) | 6(1) | 2380.8 | 2269.5 | 0.0 |



|       |       |        |        |      |
|-------|-------|--------|--------|------|
| 11(1) | 7(1)  | 2320.7 | 2196.3 | 0.8  |
| 11(1) | 8(1)  | 2233.3 | 2105.1 | 0.2  |
| 11(1) | 9(1)  | 2083.3 | 1942.4 | 1.5  |
| 11(1) | 10(1) | 2045.7 | 1917.7 | 0.7  |
| 12(1) | 1(1)  | 4560.4 | 4313.7 | 0.1  |
| 12(1) | 2(1)  | 4321.3 | 4116.4 | 0.1  |
| 12(1) | 3(1)  | 3861.6 | 3679.7 | 0.1  |
| 12(1) | 4(1)  | 2641.8 | 2567.7 | 0.2  |
| 12(1) | 5(1)  | 2498.8 | 2406.2 | 0.0  |
| 12(1) | 6(1)  | 2280.4 | 2212.0 | 0.1  |
| 12(1) | 7(1)  | 2220.3 | 2136.1 | 0.3  |
| 12(1) | 8(1)  | 2132.9 | 2046.9 | 0.2  |
| 12(1) | 9(1)  | 1982.9 | 1895.2 | 0.5  |
| 12(1) | 10(1) | 1945.3 | 1865.6 | 1.1  |
| 12(1) | 11(1) | 1743.5 | 1584.4 | 6.6  |
| 13(1) | 1(1)  | 4376.5 | 4160.7 | 0.1  |
| 13(1) | 2(1)  | 4137.3 | 3958.7 | 0.0  |
| 13(1) | 3(1)  | 3677.6 | 3525.3 | 0.0  |
| 13(1) | 4(1)  | 2457.9 | 2408.4 | 0.0  |
| 13(1) | 5(1)  | 2314.9 | 2255.5 | 0.0  |
| 13(1) | 6(1)  | 2096.5 | 2057.6 | 0.0  |
| 13(1) | 7(1)  | 2036.4 | 1984.2 | 0.0  |
| 13(1) | 8(1)  | 1948.9 | 1893.0 | 0.7  |
| 13(1) | 9(1)  | 1798.9 | 1741.7 | 7.6  |
| 13(1) | 10(1) | 1761.3 | 1711.1 | 0.6  |
| 13(1) | 11(1) | 1559.6 | 1467.5 | 1.1  |
| 13(1) | 12(1) | 1459.2 | 1412.6 | 0.3  |
| 14(1) | 1(1)  | 4202.3 | 3986.6 | 0.1  |
| 14(1) | 2(1)  | 3963.2 | 3784.6 | 0.0  |
| 14(1) | 3(1)  | 3503.4 | 3351.6 | 0.0  |
| 14(1) | 4(1)  | 2283.7 | 2238.6 | 0.1  |
| 14(1) | 5(1)  | 2140.7 | 2079.9 | 0.0  |
| 14(1) | 6(1)  | 1922.3 | 1883.6 | 0.0  |
| 14(1) | 7(1)  | 1862.2 | 1810.6 | 0.6  |
| 14(1) | 8(1)  | 1774.8 | 1717.9 | 2.0  |
| 14(1) | 9(1)  | 1624.8 | 1568.5 | 0.1  |
| 14(1) | 10(1) | 1587.2 | 1537.2 | 0.0  |
| 14(1) | 11(1) | 1385.4 | 1290.6 | 0.4  |
| 14(1) | 12(1) | 1285.0 | 1235.6 | 0.2  |
| 14(1) | 13(1) | 1101.1 | 1083.3 | 0.1  |
| 15(1) | 1(1)  | 3998.5 | 3782.2 | 0.0  |
| 15(1) | 2(1)  | 3759.3 | 3579.5 | 0.0  |
| 15(1) | 3(1)  | 3299.6 | 3145.6 | 0.0  |
| 15(1) | 4(1)  | 2079.8 | 2032.0 | 0.2  |
| 15(1) | 5(1)  | 1936.9 | 1874.3 | 0.0  |
| 15(1) | 6(1)  | 1718.5 | 1677.4 | 0.0  |
| 15(1) | 7(1)  | 1658.4 | 1606.9 | 0.4  |
| 15(1) | 8(1)  | 1570.9 | 1513.9 | 0.0  |
| 15(1) | 9(1)  | 1420.9 | 1359.1 | 1.1  |
| 15(1) | 10(1) | 1383.3 | 1330.3 | 0.5  |
| 15(1) | 11(1) | 1181.6 | 1092.4 | 13.4 |

|       |       |        |        |     |
|-------|-------|--------|--------|-----|
| 15(1) | 12(1) | 1081.2 | 1029.2 | 0.5 |
| 15(1) | 13(1) | 897.2  | 877.4  | 0.7 |
| 15(1) | 14(1) | 723.1  | 703.2  | 0.1 |
| 16(1) | 1(1)  | 7307.2 | 6933.3 | 0.0 |
| 16(1) | 2(1)  | 7068.0 | 6580.9 | 1.7 |
| 16(1) | 3(1)  | 6608.3 | 6295.7 | 0.0 |
| 16(1) | 4(1)  | 5388.6 | 5183.8 | 0.0 |
| 16(1) | 5(1)  | 5245.6 | 5005.4 | 1.5 |
| 16(1) | 6(1)  | 5027.2 | 4828.3 | 0.1 |
| 16(1) | 7(1)  | 4967.1 | 4757.9 | 0.1 |
| 16(1) | 8(1)  | 4879.6 | 4665.1 | 0.1 |
| 16(1) | 9(1)  | 4729.6 | 4515.1 | 0.1 |
| 16(1) | 10(1) | 4692.0 | 4483.5 | 0.0 |
| 16(1) | 11(1) | 4490.3 | 4251.6 | 0.5 |
| 16(1) | 12(1) | 4389.9 | 4186.1 | 0.1 |
| 16(1) | 13(1) | 4206.0 | 4028.6 | 0.0 |
| 16(1) | 14(1) | 4031.8 | 3854.6 | 0.0 |
| 16(1) | 15(1) | 3827.9 | 3649.8 | 0.0 |
| 17(1) | 1(1)  | 6808.5 | 6456.2 | 0.0 |
| 17(1) | 2(1)  | 6569.3 | 6251.5 | 0.0 |
| 17(1) | 3(1)  | 6109.6 | 5689.3 | 0.5 |
| 17(1) | 4(1)  | 4889.8 | 4705.0 | 0.0 |
| 17(1) | 5(1)  | 4746.9 | 4546.7 | 0.0 |
| 17(1) | 6(1)  | 4528.5 | 4330.6 | 0.2 |
| 17(1) | 7(1)  | 4468.4 | 4280.0 | 0.1 |
| 17(1) | 8(1)  | 4380.9 | 4184.5 | 0.0 |
| 17(1) | 9(1)  | 4230.9 | 4036.9 | 0.2 |
| 17(1) | 10(1) | 4193.3 | 4008.1 | 0.0 |
| 17(1) | 11(1) | 3991.6 | 3763.2 | 0.0 |
| 17(1) | 12(1) | 3891.2 | 3706.3 | 0.0 |
| 17(1) | 13(1) | 3707.2 | 3551.3 | 0.0 |
| 17(1) | 14(1) | 3533.1 | 3377.7 | 0.0 |
| 17(1) | 15(1) | 3329.2 | 3171.5 | 0.0 |
| 17(1) | 16(1) | 6637.9 | 6321.3 | 0.0 |
| 18(1) | 1(1)  | 5125.8 | 4881.1 | 0.0 |
| 18(1) | 2(1)  | 4886.7 | 4674.3 | 0.2 |
| 18(1) | 3(1)  | 4427.0 | 4239.4 | 0.0 |
| 18(1) | 4(1)  | 3207.2 | 3131.5 | 0.0 |
| 18(1) | 5(1)  | 3064.2 | 2964.0 | 0.3 |
| 18(1) | 6(1)  | 2845.8 | 2773.1 | 0.0 |
| 18(1) | 7(1)  | 2785.7 | 2696.9 | 0.0 |
| 18(1) | 8(1)  | 2698.3 | 2609.8 | 0.0 |
| 18(1) | 9(1)  | 2548.3 | 2460.1 | 0.0 |
| 18(1) | 10(1) | 2510.7 | 2428.7 | 0.0 |
| 18(1) | 11(1) | 2309.0 | 2182.9 | 0.1 |
| 18(1) | 12(1) | 2208.6 | 2129.0 | 0.0 |
| 18(1) | 13(1) | 2024.6 | 1976.1 | 0.0 |
| 18(1) | 14(1) | 1850.5 | 1802.2 | 0.0 |
| 18(1) | 15(1) | 1646.6 | 1595.6 | 0.0 |
| 18(1) | 16(1) | 4955.3 | 4746.8 | 0.5 |
| 18(1) | 17(1) | 4456.6 | 4268.2 | 0.0 |

|       |       |        |        |     |
|-------|-------|--------|--------|-----|
| 19(1) | 1(1)  | 4927.1 | 4689.4 | 0.0 |
| 19(1) | 2(1)  | 4687.9 | 4483.5 | 0.0 |
| 19(1) | 3(1)  | 4228.2 | 4046.0 | 0.2 |
| 19(1) | 4(1)  | 3008.5 | 2938.9 | 0.1 |
| 19(1) | 5(1)  | 2865.5 | 2777.6 | 0.2 |
| 19(1) | 6(1)  | 2647.1 | 2583.5 | 0.0 |
| 19(1) | 7(1)  | 2587.0 | 2506.8 | 0.0 |
| 19(1) | 8(1)  | 2499.6 | 2418.1 | 0.0 |
| 19(1) | 9(1)  | 2349.5 | 2264.2 | 0.0 |
| 19(1) | 10(1) | 2312.0 | 2238.3 | 0.0 |
| 19(1) | 11(1) | 2110.2 | 1993.8 | 0.1 |
| 19(1) | 12(1) | 2009.8 | 1937.5 | 0.0 |
| 19(1) | 13(1) | 1825.9 | 1784.8 | 0.0 |
| 19(1) | 14(1) | 1651.7 | 1610.6 | 0.0 |
| 19(1) | 15(1) | 1447.9 | 1406.2 | 0.0 |
| 19(1) | 16(1) | 4756.6 | 4554.4 | 0.1 |
| 19(1) | 17(1) | 4257.9 | 4074.4 | 0.1 |
| 19(1) | 18(1) | 2575.3 | 2498.3 | 0.1 |
| 20(1) | 1(1)  | 4659.4 | 4438.3 | 0.0 |
| 20(1) | 2(1)  | 4420.2 | 4233.8 | 0.0 |
| 20(1) | 3(1)  | 3960.5 | 3797.6 | 0.1 |
| 20(1) | 4(1)  | 2740.7 | 2685.7 | 0.0 |
| 20(1) | 5(1)  | 2597.8 | 2529.1 | 0.2 |
| 20(1) | 6(1)  | 2379.4 | 2331.1 | 0.2 |
| 20(1) | 7(1)  | 2319.3 | 2260.9 | 0.0 |
| 20(1) | 8(1)  | 2231.8 | 2168.9 | 0.0 |
| 20(1) | 9(1)  | 2081.8 | 2020.7 | 0.0 |
| 20(1) | 10(1) | 2044.2 | 1987.5 | 0.0 |
| 20(1) | 11(1) | 1842.5 | 1743.2 | 0.1 |
| 20(1) | 12(1) | 1742.1 | 1686.3 | 0.1 |
| 20(1) | 13(1) | 1558.1 | 1534.0 | 0.0 |
| 20(1) | 14(1) | 1384.0 | 1360.2 | 0.0 |
| 20(1) | 15(1) | 1180.1 | 1153.3 | 0.0 |
| 20(1) | 16(1) | 4488.8 | 4304.6 | 0.0 |
| 20(1) | 17(1) | 3990.1 | 3823.9 | 0.0 |
| 20(1) | 18(1) | 2307.5 | 2250.0 | 0.0 |
| 20(1) | 19(1) | 2108.8 | 2060.9 | 0.0 |
| 21(1) | 1(1)  | 4396.9 | 4129.6 | 0.6 |
| 21(1) | 2(1)  | 4157.8 | 3934.0 | 0.0 |
| 21(1) | 3(1)  | 3698.1 | 3498.9 | 0.0 |
| 21(1) | 4(1)  | 2478.3 | 2386.8 | 0.0 |
| 21(1) | 5(1)  | 2335.3 | 2229.2 | 0.0 |
| 21(1) | 6(1)  | 2116.9 | 2031.4 | 0.1 |
| 21(1) | 7(1)  | 2056.8 | 1965.2 | 0.0 |
| 21(1) | 8(1)  | 1969.4 | 1859.5 | 0.0 |
| 21(1) | 9(1)  | 1819.4 | 1713.1 | 0.0 |
| 21(1) | 10(1) | 1781.8 | 1681.9 | 0.0 |
| 21(1) | 11(1) | 1580.0 | 1444.9 | 0.0 |
| 21(1) | 12(1) | 1479.6 | 1387.2 | 0.0 |
| 21(1) | 13(1) | 1295.7 | 1229.7 | 0.1 |
| 21(1) | 14(1) | 1121.5 | 1057.3 | 0.0 |

|       |       |        |        |      |
|-------|-------|--------|--------|------|
| 21(1) | 15(1) | 917.7  | 851.7  | 0.0  |
| 21(1) | 16(1) | 4226.4 | 4004.0 | 0.0  |
| 21(1) | 17(1) | 3727.7 | 3524.7 | 0.1  |
| 21(1) | 18(1) | 2045.1 | 1951.0 | 0.0  |
| 21(1) | 19(1) | 1846.3 | 1759.9 | 0.0  |
| 21(1) | 20(1) | 1578.6 | 1509.6 | 0.1  |
| 22(1) | 1(1)  | 4249.3 | 4014.4 | 0.4  |
| 22(1) | 2(1)  | 4010.1 | 3817.5 | 0.0  |
| 22(1) | 3(1)  | 3550.4 | 3382.0 | 0.0  |
| 22(1) | 4(1)  | 2330.7 | 2269.7 | 0.0  |
| 22(1) | 5(1)  | 2187.7 | 2112.3 | 0.0  |
| 22(1) | 6(1)  | 1969.3 | 1917.7 | 0.2  |
| 22(1) | 7(1)  | 1909.2 | 1843.0 | 0.0  |
| 22(1) | 8(1)  | 1821.7 | 1749.6 | 0.0  |
| 22(1) | 9(1)  | 1671.7 | 1600.0 | 0.1  |
| 22(1) | 10(1) | 1634.1 | 1568.4 | 0.0  |
| 22(1) | 11(1) | 1432.4 | 1326.1 | 0.0  |
| 22(1) | 12(1) | 1332.0 | 1268.7 | 0.0  |
| 22(1) | 13(1) | 1148.1 | 1118.0 | 0.0  |
| 22(1) | 14(1) | 973.9  | 939.9  | 0.0  |
| 22(1) | 15(1) | 770.0  | 735.1  | 0.0  |
| 22(1) | 16(1) | 4078.8 | 3887.5 | 0.0  |
| 22(1) | 17(1) | 3580.0 | 3408.1 | 0.3  |
| 22(1) | 18(1) | 1897.4 | 1833.9 | 0.1  |
| 22(1) | 19(1) | 1698.7 | 1643.3 | 1.0  |
| 22(1) | 20(1) | 1430.9 | 1390.2 | 4.4  |
| 22(1) | 21(1) | 1168.5 | 1072.3 | 10.0 |
| 23(1) | 1(1)  | 3954.4 | 3551.7 | 0.0  |
| 23(1) | 2(1)  | 3715.2 | 3347.4 | 0.0  |
| 23(1) | 3(1)  | 3255.5 | 2913.0 | 0.0  |
| 23(1) | 4(1)  | 2035.7 | 1800.3 | 0.0  |
| 23(1) | 5(1)  | 1892.8 | 1639.4 | 0.4  |
| 23(1) | 6(1)  | 1674.4 | 1450.5 | 0.0  |
| 23(1) | 7(1)  | 1614.3 | 1376.6 | 0.0  |
| 23(1) | 8(1)  | 1526.8 | 1283.2 | 0.0  |
| 23(1) | 9(1)  | 1376.8 | 1133.7 | 0.0  |
| 23(1) | 10(1) | 1339.2 | 1101.2 | 0.3  |
| 23(1) | 11(1) | 1137.5 | 827.2  | 0.7  |
| 23(1) | 12(1) | 1037.1 | 789.9  | 0.3  |
| 23(1) | 13(1) | 853.1  | 644.0  | 0.0  |
| 23(1) | 14(1) | 679.0  | 474.5  | 0.1  |
| 23(1) | 15(1) | 475.1  | 259.5  | 0.0  |
| 23(1) | 16(1) | 3783.8 | 3418.5 | 0.4  |
| 23(1) | 17(1) | 3285.1 | 2937.0 | 0.2  |
| 23(1) | 18(1) | 1602.5 | 1354.2 | 0.1  |
| 23(1) | 19(1) | 1403.8 | 1166.2 | 0.2  |
| 23(1) | 20(1) | 1136.0 | 920.5  | 15.1 |
| 23(1) | 21(1) | 873.6  | 620.5  | 0.1  |
| 23(1) | 22(1) | 725.9  | 501.2  | 0.1  |
| 24(1) | 1(1)  | 3796.5 | 3599.8 | 0.0  |
| 24(1) | 2(1)  | 3557.4 | 3397.9 | 0.0  |

|       |       |        |        |     |
|-------|-------|--------|--------|-----|
| 24(1) | 3(1)  | 3097.7 | 2970.7 | 0.2 |
| 24(1) | 4(1)  | 1877.9 | 1850.5 | 0.2 |
| 24(1) | 5(1)  | 1734.9 | 1698.9 | 0.7 |
| 24(1) | 6(1)  | 1516.5 | 1506.1 | 0.0 |
| 24(1) | 7(1)  | 1456.4 | 1427.5 | 0.2 |
| 24(1) | 8(1)  | 1369.0 | 1335.9 | 0.0 |
| 24(1) | 9(1)  | 1219.0 | 1184.7 | 1.6 |
| 24(1) | 10(1) | 1181.4 | 1153.5 | 0.0 |
| 24(1) | 11(1) | 979.7  | 899.8  | 0.0 |
| 24(1) | 12(1) | 879.3  | 849.7  | 0.0 |
| 24(1) | 13(1) | 695.3  | 702.6  | 1.6 |
| 24(1) | 14(1) | 521.2  | 523.5  | 0.1 |
| 24(1) | 15(1) | 317.3  | 315.3  | 0.1 |
| 24(1) | 16(1) | 3626.0 | 3468.9 | 0.3 |
| 24(1) | 17(1) | 3127.3 | 2996.6 | 0.8 |
| 24(1) | 18(1) | 1444.7 | 1418.4 | 2.1 |
| 24(1) | 19(1) | 1245.9 | 1224.2 | 2.3 |
| 24(1) | 20(1) | 978.2  | 975.6  | 1.1 |
| 24(1) | 21(1) | 715.8  | 677.3  | 0.4 |
| 24(1) | 22(1) | 568.1  | 557.7  | 1.0 |
| 24(1) | 23(1) | 273.2  | 31.1   | 0.3 |

**Table S12.** Harmonic and anharmonic vibrational frequencies and their intensities of glycine conformer **III** as computed at the B3LYP/cc-pVTZ level of theory.

| Mode (quanta) | $\nu_{\text{harm}}$ ( $\text{cm}^{-1}$ ) | $\nu_{\text{anharm}}$ ( $\text{cm}^{-1}$ ) | $I_{\text{harm}}$ ( $\text{km mol}^{-1}$ ) | $I_{\text{anharm}}$ ( $\text{km mol}^{-1}$ ) |
|---------------|------------------------------------------|--------------------------------------------|--------------------------------------------|----------------------------------------------|
| 1(1)          | 3739.3                                   | 3548.0                                     | 60.8                                       | 47.8                                         |
| 2(1)          | 3581.4                                   | 3406.6                                     | 3.3                                        | 0.9                                          |
| 3(1)          | 3508.5                                   | 3357.2                                     | 1.5                                        | 0.4                                          |
| 4(1)          | 3077.6                                   | 2948.9                                     | 6.0                                        | 5.6                                          |
| 5(1)          | 3047.5                                   | 2913.9                                     | 16.2                                       | 16.0                                         |
| 6(1)          | 1816.7                                   | 1781.4                                     | 280.2                                      | 250.5                                        |
| 7(1)          | 1675.7                                   | 1584.6                                     | 24.5                                       | 19.9                                         |
| 8(1)          | 1458.3                                   | 1418.0                                     | 2.7                                        | 2.3                                          |
| 9(1)          | 1387.1                                   | 1337.3                                     | 0.0                                        | 0.1                                          |
| 10(1)         | 1361.5                                   | 1317.0                                     | 15.5                                       | 8.3                                          |
| 11(1)         | 1350.3                                   | 1340.5                                     | 37.9                                       | 33.0                                         |
| 12(1)         | 1193.8                                   | 1176.0                                     | 1.1                                        | 1.5                                          |
| 13(1)         | 1164.9                                   | 1122.5                                     | 224.1                                      | 131.7                                        |
| 14(1)         | 1131.1                                   | 1092.0                                     | 30.5                                       | 17.4                                         |
| 15(1)         | 911.5                                    | 897.6                                      | 3.7                                        | 2.6                                          |
| 16(1)         | 892.7                                    | 858.7                                      | 156.7                                      | 147.6                                        |
| 17(1)         | 798.8                                    | 784.6                                      | 77.5                                       | 75.9                                         |
| 18(1)         | 684.8                                    | 658.9                                      | 98.4                                       | 82.1                                         |
| 19(1)         | 596.2                                    | 600.5                                      | 48.8                                       | 49.3                                         |
| 20(1)         | 517.5                                    | 496.7                                      | 24.8                                       | 30.0                                         |
| 21(1)         | 498.3                                    | 486.1                                      | 12.2                                       | 9.0                                          |
| 22(1)         | 262.1                                    | 271.8                                      | 2.2                                        | 1.7                                          |
| 23(1)         | 239.5                                    | 379.0                                      | 42.4                                       | 27.1                                         |
| 24(1)         | 32.2                                     | 38.1                                       | 0.0                                        | 3.3                                          |

|           |        |        |     |
|-----------|--------|--------|-----|
| 1(2)      | 7478.6 | 6923.2 | 4.1 |
| 2(2)      | 7162.9 | 6724.4 | 0.9 |
| 3(2)      | 7016.9 | 6587.0 | 1.0 |
| 4(2)      | 6155.1 | 5796.6 | 0.4 |
| 5(2)      | 6095.0 | 5736.9 | 0.2 |
| 6(2)      | 3633.5 | 3545.6 | 3.0 |
| 7(2)      | 3351.4 | 3200.9 | 0.0 |
| 8(2)      | 2916.6 | 2811.5 | 0.2 |
| 9(2)      | 2774.2 | 2677.0 | 0.0 |
| 10(2)     | 2723.1 | 2618.8 | 0.1 |
| 11(2)     | 2700.5 | 2597.8 | 0.9 |
| 12(2)     | 2387.6 | 2323.1 | 0.1 |
| 13(2)     | 2329.8 | 2232.9 | 1.7 |
| 14(2)     | 2262.2 | 2173.4 | 0.1 |
| 15(2)     | 1823.1 | 1798.0 | 0.1 |
| 16(2)     | 1785.4 | 1699.2 | 5.2 |
| 17(2)     | 1597.6 | 1562.1 | 4.1 |
| 18(2)     | 1369.6 | 1269.3 | 5.4 |
| 19(2)     | 1192.4 | 1179.6 | 3.6 |
| 20(2)     | 1035.0 | 1016.8 | 0.8 |
| 21(2)     | 996.7  | 971.2  | 0.2 |
| 22(2)     | 524.1  | 545.5  | 0.3 |
| 23(2)     | 479.0  | 824.3  | 1.3 |
| 24(2)     | 64.4   | 67.3   | 0.1 |
| 2(1) 1(1) | 7320.7 | 6954.6 | 0.0 |
| 3(1) 1(1) | 7247.7 | 6880.5 | 0.0 |
| 3(1) 2(1) | 7089.9 | 6588.0 | 1.8 |
| 4(1) 1(1) | 6816.9 | 6479.9 | 0.0 |
| 4(1) 2(1) | 6659.0 | 6337.3 | 0.0 |
| 4(1) 3(1) | 6586.0 | 6263.3 | 0.0 |
| 5(1) 1(1) | 6786.8 | 6446.2 | 0.0 |
| 5(1) 2(1) | 6628.9 | 6304.1 | 0.0 |
| 5(1) 3(1) | 6556.0 | 6229.9 | 0.0 |
| 5(1) 4(1) | 6125.1 | 5699.4 | 0.5 |
| 6(1) 1(1) | 5556.0 | 5329.3 | 0.7 |
| 6(1) 2(1) | 5398.2 | 5189.5 | 0.0 |
| 6(1) 3(1) | 5325.2 | 5115.3 | 0.0 |
| 6(1) 4(1) | 4894.3 | 4714.6 | 0.2 |
| 6(1) 5(1) | 4864.3 | 4680.1 | 0.3 |
| 7(1) 1(1) | 5415.0 | 5163.3 | 0.0 |
| 7(1) 2(1) | 5257.1 | 5001.5 | 1.6 |
| 7(1) 3(1) | 5184.1 | 4911.3 | 0.0 |
| 7(1) 4(1) | 4753.2 | 4549.3 | 0.0 |
| 7(1) 5(1) | 4723.2 | 4512.5 | 0.0 |
| 7(1) 6(1) | 3492.4 | 3398.0 | 0.0 |
| 8(1) 1(1) | 5197.6 | 4965.9 | 0.0 |
| 8(1) 2(1) | 5039.7 | 4824.2 | 0.0 |
| 8(1) 3(1) | 4966.8 | 4749.9 | 0.0 |
| 8(1) 4(1) | 4535.9 | 4327.6 | 0.2 |
| 8(1) 5(1) | 4505.8 | 4285.1 | 0.2 |
| 8(1) 6(1) | 3275.1 | 3200.1 | 0.1 |

|       |       |        |        |     |
|-------|-------|--------|--------|-----|
| 8(1)  | 7(1)  | 3134.0 | 3033.5 | 0.0 |
| 9(1)  | 1(1)  | 5126.4 | 4889.4 | 0.0 |
| 9(1)  | 2(1)  | 4968.6 | 4746.7 | 0.5 |
| 9(1)  | 3(1)  | 4895.6 | 4670.5 | 0.2 |
| 9(1)  | 4(1)  | 4464.7 | 4273.0 | 0.0 |
| 9(1)  | 5(1)  | 4434.6 | 4234.1 | 0.0 |
| 9(1)  | 6(1)  | 3203.9 | 3123.7 | 0.0 |
| 9(1)  | 7(1)  | 3062.8 | 2943.8 | 2.6 |
| 9(1)  | 8(1)  | 2845.4 | 2755.2 | 0.0 |
| 10(1) | 1(1)  | 5100.8 | 4864.6 | 0.0 |
| 10(1) | 2(1)  | 4943.0 | 4722.6 | 0.3 |
| 10(1) | 3(1)  | 4870.0 | 4648.5 | 0.2 |
| 10(1) | 4(1)  | 4439.1 | 4241.3 | 0.0 |
| 10(1) | 5(1)  | 4409.0 | 4223.1 | 0.0 |
| 10(1) | 6(1)  | 3178.3 | 3098.4 | 0.5 |
| 10(1) | 7(1)  | 3037.2 | 2936.5 | 0.1 |
| 10(1) | 8(1)  | 2819.8 | 2733.4 | 0.1 |
| 10(1) | 9(1)  | 2748.7 | 2647.2 | 0.0 |
| 11(1) | 1(1)  | 5089.6 | 4835.1 | 0.9 |
| 11(1) | 2(1)  | 4931.7 | 4711.6 | 0.0 |
| 11(1) | 3(1)  | 4858.7 | 4637.7 | 0.0 |
| 11(1) | 4(1)  | 4427.8 | 4236.8 | 0.0 |
| 11(1) | 5(1)  | 4397.8 | 4203.6 | 0.0 |
| 11(1) | 6(1)  | 3167.0 | 3083.6 | 0.4 |
| 11(1) | 7(1)  | 3026.0 | 2920.5 | 0.1 |
| 11(1) | 8(1)  | 2808.6 | 2721.8 | 0.1 |
| 11(1) | 9(1)  | 2737.4 | 2646.0 | 0.0 |
| 11(1) | 10(1) | 2711.8 | 2620.0 | 0.0 |
| 12(1) | 1(1)  | 4933.1 | 4710.9 | 0.0 |
| 12(1) | 2(1)  | 4775.2 | 4567.4 | 0.0 |
| 12(1) | 3(1)  | 4702.2 | 4492.4 | 0.0 |
| 12(1) | 4(1)  | 4271.4 | 4091.1 | 0.1 |
| 12(1) | 5(1)  | 4241.3 | 4055.3 | 0.1 |
| 12(1) | 6(1)  | 3010.5 | 2944.3 | 0.0 |
| 12(1) | 7(1)  | 2869.5 | 2773.4 | 0.2 |
| 12(1) | 8(1)  | 2652.1 | 2579.8 | 0.0 |
| 12(1) | 9(1)  | 2580.9 | 2497.5 | 0.1 |
| 12(1) | 10(1) | 2555.3 | 2468.9 | 0.0 |
| 12(1) | 11(1) | 2544.1 | 2466.7 | 0.0 |
| 13(1) | 1(1)  | 4904.2 | 4663.0 | 0.2 |
| 13(1) | 2(1)  | 4746.3 | 4529.3 | 0.0 |
| 13(1) | 3(1)  | 4673.4 | 4455.3 | 0.0 |
| 13(1) | 4(1)  | 4242.5 | 4053.7 | 0.0 |
| 13(1) | 5(1)  | 4212.4 | 4020.1 | 0.1 |
| 13(1) | 6(1)  | 2981.7 | 2901.7 | 0.8 |
| 13(1) | 7(1)  | 2840.6 | 2737.8 | 0.0 |
| 13(1) | 8(1)  | 2623.2 | 2539.3 | 0.3 |
| 13(1) | 9(1)  | 2552.0 | 2463.3 | 0.0 |
| 13(1) | 10(1) | 2526.4 | 2437.8 | 0.1 |
| 13(1) | 11(1) | 2515.2 | 2411.2 | 1.7 |
| 13(1) | 12(1) | 2358.7 | 2279.5 | 0.0 |

|       |       |        |        |     |
|-------|-------|--------|--------|-----|
| 14(1) | 1(1)  | 4870.4 | 4638.7 | 0.0 |
| 14(1) | 2(1)  | 4712.5 | 4496.8 | 0.1 |
| 14(1) | 3(1)  | 4639.6 | 4421.9 | 0.1 |
| 14(1) | 4(1)  | 4208.7 | 4025.3 | 0.1 |
| 14(1) | 5(1)  | 4178.6 | 3991.1 | 0.3 |
| 14(1) | 6(1)  | 2947.9 | 2873.8 | 0.0 |
| 14(1) | 7(1)  | 2806.8 | 2703.6 | 0.2 |
| 14(1) | 8(1)  | 2589.4 | 2508.7 | 0.0 |
| 14(1) | 9(1)  | 2518.2 | 2427.8 | 0.0 |
| 14(1) | 10(1) | 2492.6 | 2404.5 | 0.1 |
| 14(1) | 11(1) | 2481.4 | 2396.4 | 0.1 |
| 14(1) | 12(1) | 2324.9 | 2251.0 | 0.0 |
| 14(1) | 13(1) | 2296.0 | 2213.7 | 0.4 |
| 15(1) | 1(1)  | 4650.8 | 4445.4 | 0.0 |
| 15(1) | 2(1)  | 4493.0 | 4302.9 | 0.0 |
| 15(1) | 3(1)  | 4420.0 | 4228.3 | 0.0 |
| 15(1) | 4(1)  | 3989.1 | 3825.5 | 0.0 |
| 15(1) | 5(1)  | 3959.0 | 3791.6 | 0.1 |
| 15(1) | 6(1)  | 2728.3 | 2678.5 | 0.0 |
| 15(1) | 7(1)  | 2587.2 | 2510.7 | 0.2 |
| 15(1) | 8(1)  | 2369.8 | 2311.7 | 0.2 |
| 15(1) | 9(1)  | 2298.7 | 2235.3 | 0.0 |
| 15(1) | 10(1) | 2273.1 | 2214.5 | 0.0 |
| 15(1) | 11(1) | 2261.8 | 2199.5 | 0.0 |
| 15(1) | 12(1) | 2105.3 | 2060.0 | 0.1 |
| 15(1) | 13(1) | 2076.4 | 2018.4 | 0.0 |
| 15(1) | 14(1) | 2042.6 | 1986.3 | 0.0 |
| 16(1) | 1(1)  | 4632.0 | 4406.2 | 0.0 |
| 16(1) | 2(1)  | 4474.1 | 4274.9 | 0.6 |
| 16(1) | 3(1)  | 4401.1 | 4200.0 | 0.3 |
| 16(1) | 4(1)  | 3970.2 | 3789.4 | 0.0 |
| 16(1) | 5(1)  | 3940.2 | 3755.4 | 0.1 |
| 16(1) | 6(1)  | 2709.4 | 2642.7 | 0.2 |
| 16(1) | 7(1)  | 2568.4 | 2446.5 | 0.0 |
| 16(1) | 8(1)  | 2351.0 | 2275.2 | 0.0 |
| 16(1) | 9(1)  | 2279.8 | 2195.1 | 0.1 |
| 16(1) | 10(1) | 2254.2 | 2171.6 | 0.4 |
| 16(1) | 11(1) | 2243.0 | 2159.8 | 0.3 |
| 16(1) | 12(1) | 2086.5 | 2020.3 | 0.1 |
| 16(1) | 13(1) | 2057.6 | 1979.2 | 1.1 |
| 16(1) | 14(1) | 2023.8 | 1934.1 | 2.0 |
| 16(1) | 15(1) | 1804.2 | 1753.3 | 0.1 |
| 17(1) | 1(1)  | 4538.1 | 4330.5 | 0.1 |
| 17(1) | 2(1)  | 4380.2 | 4193.7 | 0.1 |
| 17(1) | 3(1)  | 4307.3 | 4119.7 | 0.1 |
| 17(1) | 4(1)  | 3876.4 | 3716.1 | 0.0 |
| 17(1) | 5(1)  | 3846.3 | 3682.0 | 0.0 |
| 17(1) | 6(1)  | 2615.6 | 2567.6 | 0.1 |
| 17(1) | 7(1)  | 2474.5 | 2403.7 | 0.0 |
| 17(1) | 8(1)  | 2257.1 | 2201.4 | 0.1 |
| 17(1) | 9(1)  | 2185.9 | 2123.7 | 0.0 |



|       |       |        |        |     |
|-------|-------|--------|--------|-----|
| 17(1) | 10(1) | 2160.3 | 2099.3 | 0.1 |
| 17(1) | 11(1) | 2149.1 | 2088.6 | 0.1 |
| 17(1) | 12(1) | 1992.6 | 1945.7 | 0.0 |
| 17(1) | 13(1) | 1963.7 | 1901.3 | 2.5 |
| 17(1) | 14(1) | 1929.9 | 1872.8 | 0.3 |
| 17(1) | 15(1) | 1710.4 | 1680.8 | 0.1 |
| 17(1) | 16(1) | 1691.5 | 1658.9 | 0.0 |
| 18(1) | 1(1)  | 4424.1 | 4207.5 | 0.7 |
| 18(1) | 2(1)  | 4266.3 | 4065.3 | 0.0 |
| 18(1) | 3(1)  | 4193.3 | 3991.4 | 0.0 |
| 18(1) | 4(1)  | 3762.4 | 3589.6 | 0.0 |
| 18(1) | 5(1)  | 3732.3 | 3556.1 | 0.0 |
| 18(1) | 6(1)  | 2501.6 | 2440.8 | 0.0 |
| 18(1) | 7(1)  | 2360.5 | 2274.5 | 0.0 |
| 18(1) | 8(1)  | 2143.1 | 2075.5 | 0.0 |
| 18(1) | 9(1)  | 2071.9 | 2000.2 | 0.0 |
| 18(1) | 10(1) | 2046.4 | 1975.1 | 0.0 |
| 18(1) | 11(1) | 2035.1 | 1958.3 | 0.0 |
| 18(1) | 12(1) | 1878.6 | 1821.6 | 0.0 |
| 18(1) | 13(1) | 1849.7 | 1775.0 | 0.0 |
| 18(1) | 14(1) | 1815.9 | 1751.1 | 0.0 |
| 18(1) | 15(1) | 1596.4 | 1556.9 | 0.2 |
| 18(1) | 16(1) | 1577.5 | 1516.1 | 0.1 |
| 18(1) | 17(1) | 1483.6 | 1441.6 | 0.0 |
| 19(1) | 1(1)  | 4335.5 | 4131.4 | 0.2 |
| 19(1) | 2(1)  | 4177.6 | 3995.5 | 0.0 |
| 19(1) | 3(1)  | 4104.6 | 3921.6 | 0.0 |
| 19(1) | 4(1)  | 3673.7 | 3521.0 | 0.0 |
| 19(1) | 5(1)  | 3643.7 | 3487.3 | 0.0 |
| 19(1) | 6(1)  | 2412.9 | 2369.3 | 0.0 |
| 19(1) | 7(1)  | 2271.9 | 2205.6 | 0.0 |
| 19(1) | 8(1)  | 2054.5 | 2007.0 | 0.0 |
| 19(1) | 9(1)  | 1983.3 | 1930.7 | 0.0 |
| 19(1) | 10(1) | 1957.7 | 1905.3 | 0.1 |
| 19(1) | 11(1) | 1946.4 | 1890.7 | 1.4 |
| 19(1) | 12(1) | 1790.0 | 1752.4 | 0.0 |
| 19(1) | 13(1) | 1761.1 | 1708.3 | 0.6 |
| 19(1) | 14(1) | 1727.3 | 1681.0 | 0.3 |
| 19(1) | 15(1) | 1507.7 | 1486.7 | 0.0 |
| 19(1) | 16(1) | 1488.9 | 1447.1 | 0.5 |
| 19(1) | 17(1) | 1395.0 | 1374.1 | 1.5 |
| 19(1) | 18(1) | 1281.0 | 1251.2 | 0.0 |
| 20(1) | 1(1)  | 4256.8 | 4055.6 | 0.4 |
| 20(1) | 2(1)  | 4098.9 | 3915.7 | 0.0 |
| 20(1) | 3(1)  | 4025.9 | 3841.7 | 0.0 |
| 20(1) | 4(1)  | 3595.0 | 3439.1 | 0.3 |
| 20(1) | 5(1)  | 3565.0 | 3405.4 | 0.0 |
| 20(1) | 6(1)  | 2334.2 | 2289.9 | 0.0 |
| 20(1) | 7(1)  | 2193.2 | 2124.2 | 0.0 |
| 20(1) | 8(1)  | 1975.8 | 1927.2 | 0.2 |
| 20(1) | 9(1)  | 1904.6 | 1849.2 | 0.0 |

|       |       |        |        |      |
|-------|-------|--------|--------|------|
| 20(1) | 10(1) | 1879.0 | 1825.2 | 0.0  |
| 20(1) | 11(1) | 1867.8 | 1812.1 | 0.0  |
| 20(1) | 12(1) | 1711.3 | 1671.7 | 1.1  |
| 20(1) | 13(1) | 1682.4 | 1630.4 | 0.0  |
| 20(1) | 14(1) | 1648.6 | 1601.1 | 0.0  |
| 20(1) | 15(1) | 1429.0 | 1405.8 | 1.0  |
| 20(1) | 16(1) | 1410.2 | 1365.3 | 0.0  |
| 20(1) | 17(1) | 1316.3 | 1292.1 | 0.0  |
| 20(1) | 18(1) | 1202.3 | 1161.2 | 2.9  |
| 20(1) | 19(1) | 1113.7 | 1094.0 | 0.0  |
| 21(1) | 1(1)  | 4237.6 | 4033.3 | 0.0  |
| 21(1) | 2(1)  | 4079.8 | 3892.4 | 0.0  |
| 21(1) | 3(1)  | 4006.8 | 3818.3 | 0.0  |
| 21(1) | 4(1)  | 3575.9 | 3418.6 | 0.0  |
| 21(1) | 5(1)  | 3545.8 | 3384.8 | 0.0  |
| 21(1) | 6(1)  | 2315.1 | 2265.0 | 0.1  |
| 21(1) | 7(1)  | 2174.0 | 2101.6 | 0.0  |
| 21(1) | 8(1)  | 1956.6 | 1903.9 | 0.1  |
| 21(1) | 9(1)  | 1885.5 | 1827.0 | 0.0  |
| 21(1) | 10(1) | 1859.9 | 1800.3 | 0.1  |
| 21(1) | 11(1) | 1848.6 | 1791.5 | 3.5  |
| 21(1) | 12(1) | 1692.1 | 1649.0 | 0.0  |
| 21(1) | 13(1) | 1663.2 | 1606.8 | 0.1  |
| 21(1) | 14(1) | 1629.4 | 1576.8 | 0.1  |
| 21(1) | 15(1) | 1409.9 | 1383.9 | 0.0  |
| 21(1) | 16(1) | 1391.0 | 1348.6 | 7.0  |
| 21(1) | 17(1) | 1297.2 | 1266.6 | 0.1  |
| 21(1) | 18(1) | 1183.2 | 1145.1 | 0.0  |
| 21(1) | 19(1) | 1094.5 | 1075.1 | 0.7  |
| 21(1) | 20(1) | 1015.8 | 990.1  | 0.0  |
| 22(1) | 1(1)  | 4001.4 | 3819.0 | 0.1  |
| 22(1) | 2(1)  | 3843.5 | 3679.1 | 0.0  |
| 22(1) | 3(1)  | 3770.5 | 3605.1 | 0.0  |
| 22(1) | 4(1)  | 3339.6 | 3203.8 | 0.0  |
| 22(1) | 5(1)  | 3309.6 | 3170.1 | 0.0  |
| 22(1) | 6(1)  | 2078.8 | 2053.6 | 0.3  |
| 22(1) | 7(1)  | 1937.7 | 1887.5 | 0.0  |
| 22(1) | 8(1)  | 1720.4 | 1689.0 | 0.1  |
| 22(1) | 9(1)  | 1649.2 | 1612.7 | 0.0  |
| 22(1) | 10(1) | 1623.6 | 1588.9 | 0.2  |
| 22(1) | 11(1) | 1612.3 | 1576.4 | 0.1  |
| 22(1) | 12(1) | 1455.9 | 1436.2 | 0.0  |
| 22(1) | 13(1) | 1427.0 | 1395.9 | 0.7  |
| 22(1) | 14(1) | 1393.2 | 1359.1 | 0.1  |
| 22(1) | 15(1) | 1173.6 | 1169.2 | 0.0  |
| 22(1) | 16(1) | 1154.7 | 1134.1 | 73.5 |
| 22(1) | 17(1) | 1060.9 | 1056.8 | 0.5  |
| 22(1) | 18(1) | 946.9  | 931.0  | 0.0  |
| 22(1) | 19(1) | 858.2  | 862.4  | 0.4  |
| 22(1) | 20(1) | 779.5  | 780.5  | 0.0  |
| 22(1) | 21(1) | 760.4  | 757.5  | 0.7  |

|       |       |        |        |      |
|-------|-------|--------|--------|------|
| 23(1) | 1(1)  | 3978.8 | 3927.7 | 0.0  |
| 23(1) | 2(1)  | 3820.9 | 3787.8 | 0.4  |
| 23(1) | 3(1)  | 3747.9 | 3712.9 | 0.1  |
| 23(1) | 4(1)  | 3317.0 | 3306.8 | 0.2  |
| 23(1) | 5(1)  | 3287.0 | 3274.8 | 0.0  |
| 23(1) | 6(1)  | 2056.2 | 2161.6 | 0.0  |
| 23(1) | 7(1)  | 1915.2 | 1996.3 | 0.5  |
| 23(1) | 8(1)  | 1697.8 | 1799.9 | 0.0  |
| 23(1) | 9(1)  | 1626.6 | 1716.9 | 0.1  |
| 23(1) | 10(1) | 1601.0 | 1693.7 | 0.0  |
| 23(1) | 11(1) | 1589.8 | 1684.4 | 0.0  |
| 23(1) | 12(1) | 1433.3 | 1547.3 | 1.8  |
| 23(1) | 13(1) | 1404.4 | 1501.9 | 0.1  |
| 23(1) | 14(1) | 1370.6 | 1472.0 | 0.4  |
| 23(1) | 15(1) | 1151.0 | 1287.2 | 22.5 |
| 23(1) | 16(1) | 1132.2 | 1260.1 | 1.1  |
| 23(1) | 17(1) | 1038.3 | 1180.3 | 0.6  |
| 23(1) | 18(1) | 924.3  | 1036.6 | 3.1  |
| 23(1) | 19(1) | 835.7  | 973.7  | 0.1  |
| 23(1) | 20(1) | 757.0  | 884.0  | 0.0  |
| 23(1) | 21(1) | 737.8  | 866.3  | 0.0  |
| 23(1) | 22(1) | 501.5  | 666.4  | 0.0  |
| 24(1) | 1(1)  | 3771.5 | 3588.2 | 0.0  |
| 24(1) | 2(1)  | 3613.6 | 3440.0 | 0.3  |
| 24(1) | 3(1)  | 3540.7 | 3364.5 | 0.0  |
| 24(1) | 4(1)  | 3109.8 | 2976.9 | 1.9  |
| 24(1) | 5(1)  | 3079.7 | 2913.1 | 0.3  |
| 24(1) | 6(1)  | 1848.9 | 1818.3 | 1.9  |
| 24(1) | 7(1)  | 1707.9 | 1645.0 | 0.6  |
| 24(1) | 8(1)  | 1490.5 | 1454.9 | 0.2  |
| 24(1) | 9(1)  | 1419.3 | 1370.8 | 0.5  |
| 24(1) | 10(1) | 1393.7 | 1346.9 | 0.0  |
| 24(1) | 11(1) | 1382.5 | 1345.2 | 0.0  |
| 24(1) | 12(1) | 1226.0 | 1197.3 | 8.3  |
| 24(1) | 13(1) | 1197.1 | 1145.1 | 0.4  |
| 24(1) | 14(1) | 1163.3 | 1126.1 | 0.3  |
| 24(1) | 15(1) | 943.7  | 931.4  | 0.4  |
| 24(1) | 16(1) | 924.9  | 903.2  | 0.4  |
| 24(1) | 17(1) | 831.0  | 826.3  | 0.2  |
| 24(1) | 18(1) | 717.0  | 696.3  | 0.5  |
| 24(1) | 19(1) | 628.4  | 626.7  | 8.8  |
| 24(1) | 20(1) | 549.7  | 541.2  | 1.1  |
| 24(1) | 21(1) | 530.5  | 527.6  | 0.1  |
| 24(1) | 22(1) | 294.3  | 308.9  | 0.3  |
| 24(1) | 23(1) | 271.7  | 493.9  | 1.9  |

**Table S13.** Vibrational band positions ( $\tilde{\nu}$ , in  $\text{cm}^{-1}$ ) used to determine the column densities ( $N_t(\mathbf{X})$  for species  $\mathbf{X}$  in  $\text{cm}^{-2}$ ).

| Species            | Experiment                    | $\tilde{\nu}$  |                |                |       |   |
|--------------------|-------------------------------|----------------|----------------|----------------|-------|---|
| <i>trans</i> -FA   | Ar (6929.9 $\text{cm}^{-1}$ ) | 1768.1         | 1106.4, 1104.3 | —              | —     | — |
|                    | Ar (6934.7 $\text{cm}^{-1}$ ) | 1768.1         | 1104.3         | —              | —     | — |
|                    | <i>n</i> -H <sub>2</sub>      | 1765.4         | 1108.8         | —              | —     | — |
|                    | <i>p</i> -H <sub>2</sub>      | 1768.1         | 1106.3         | —              | —     | — |
| <i>cis</i> -FA     | Ar                            | 1808.0         | 1243.5         | —              | —     | — |
|                    | <i>n</i> -H <sub>2</sub>      | 1804.8         | 1250.1         | —              | —     | — |
|                    | <i>p</i> -H <sub>2</sub>      | 1807.7         | 1247.8         | —              | —     | — |
| <i>trans</i> -AA   | Ar                            | 1379.6         | 1259.3         | 1180.2, 1150.5 | 985.8 | — |
| <i>cis</i> -AA     | Ar                            | 1807.3         | 1285.3, 1271.7 | —              | —     | — |
| glycine <b>I</b>   | Ar                            | 1781.1         | —              | —              | —     | — |
|                    | <i>n</i> -H <sub>2</sub>      | 1781.0         | —              | —              | —     | — |
|                    | <i>p</i> -H <sub>2</sub>      | 1784.7         | —              | —              | —     | — |
| glycine <b>III</b> | Ar                            | 1774.9, 1769.0 | —              | —              | —     | — |
|                    | <i>n</i> -H <sub>2</sub>      | 1770.6         | —              | —              | —     | — |
|                    | <i>p</i> -H <sub>2</sub>      | 1779.0         | —              | —              | —     | — |

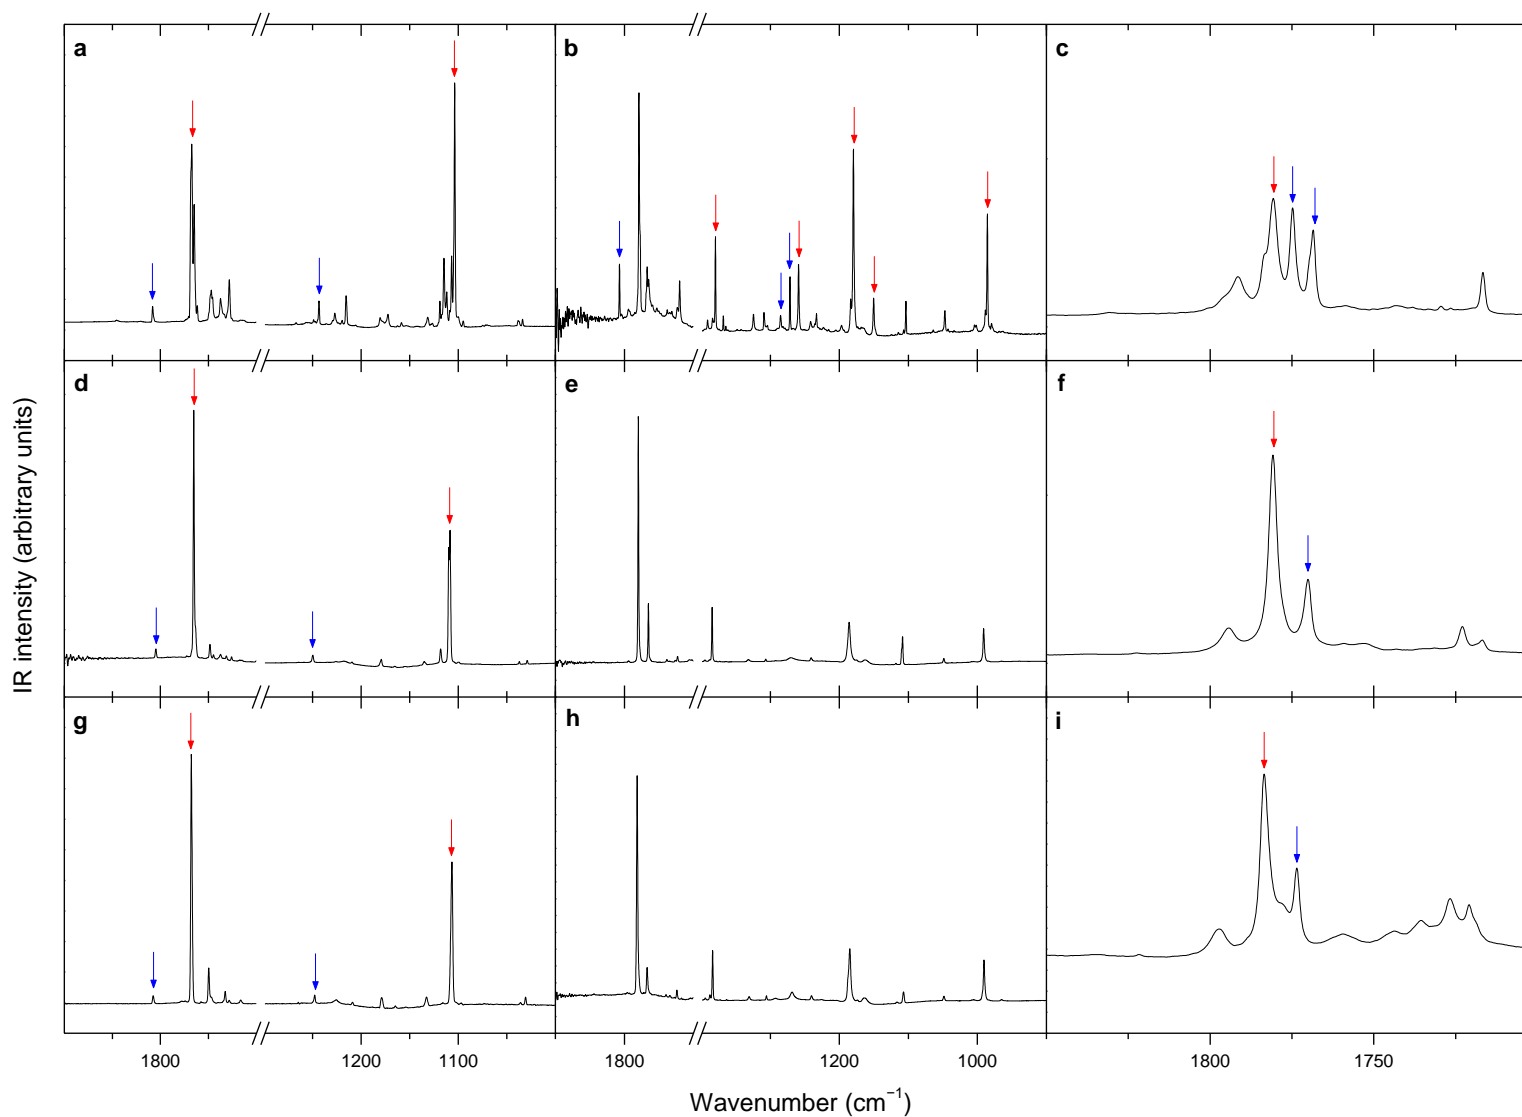

**Figure S1.** MIR spectra taken after excitations showing the bands used to determine the column density values in the case of the FA (**a**), AA (**b**), and glycine (**c**) isolated in Ar as well as the same species in *n*-H<sub>2</sub> (**d–f**), and *p*-H<sub>2</sub> (**g–i**) matrices as marked by arrows. Red arrows denote the *cis* carboxylic acids and glycine **I** conformers, whereas the blue ones represent the *trans* form of carboxylic acids and the glycine **III** conformer.

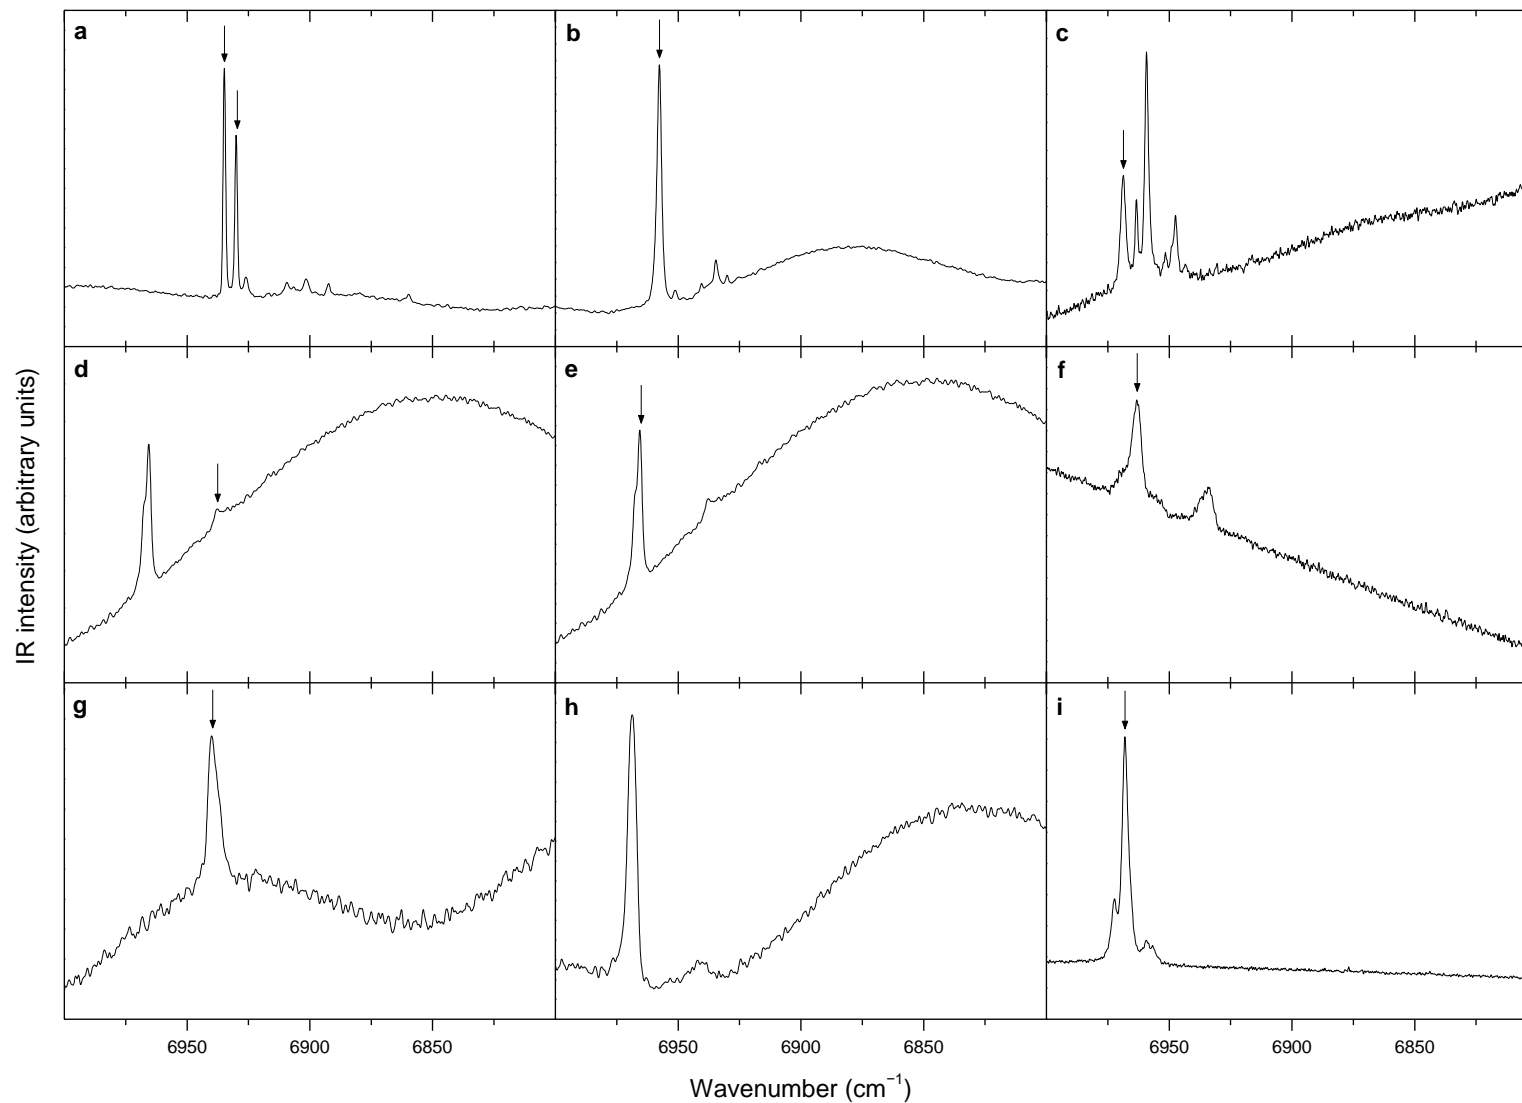

**Figure S2.** Bands used for the NIR excitations in the case of the FA (a), AA (b), and glycine (c) isolated in Ar as well as the same species in  $n\text{-H}_2$  (d-f), and  $p\text{-H}_2$  (g-i) matrices as marked by arrows.

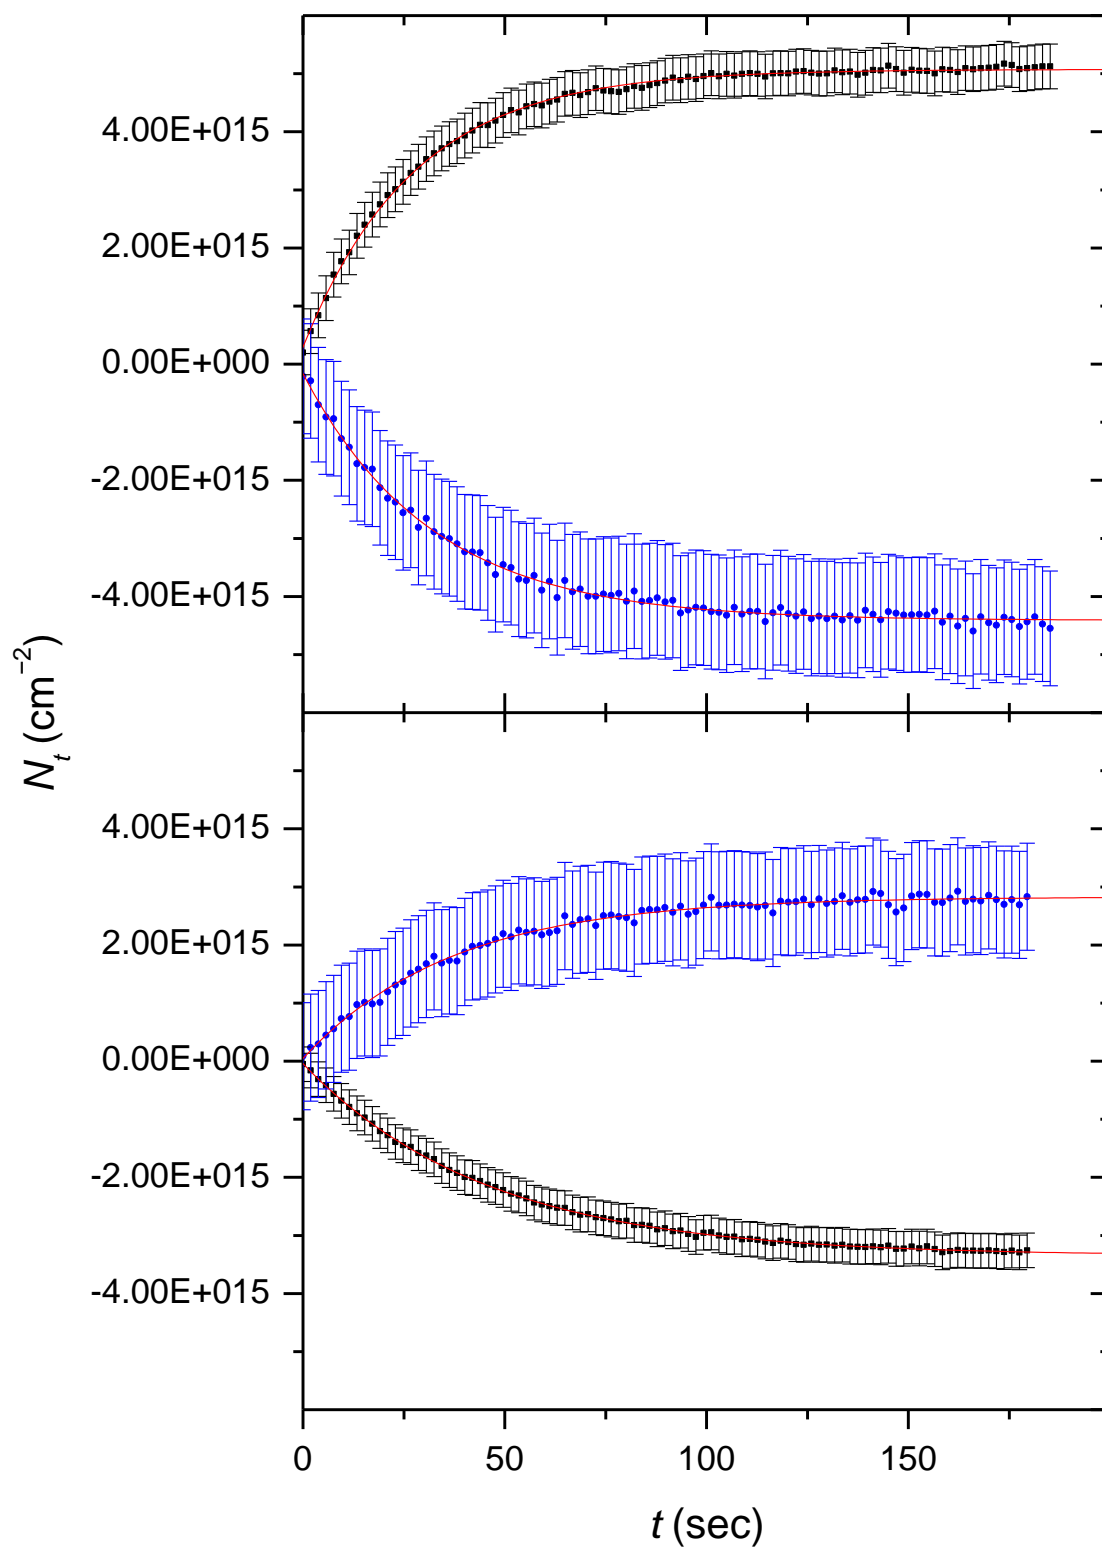

**Figure S3.** Kinetic plots of the AA–Ar system during (a) and after (b) the NIR laser excitation of  $6957.9\text{ cm}^{-1}$ . Blue symbols show the column densities of the *trans*, the black ones display those of the *cis* isomers, whereas the red traces display the kinetic fit.
